1     **Avidity-driven polarity establishment via multivalent lipid-**  
2                               **GTPase module interactions**

3  
4     Julien Meca<sup>1,3</sup>, Aurélie Massoni-Laporte<sup>1,3</sup>, Elodie Sartorel<sup>1</sup>, Denis Martinez<sup>2</sup>,  
5     Antoine Loquet<sup>2</sup>, Birgit Habenstein<sup>2</sup> and Derek McCusker<sup>1,4\*</sup>

6     <sup>1</sup> Univ. Bordeaux, CNRS, UMR 5095, European Institute of Chemistry and  
7     Biology, 2 rue Robert Escarpit, Pessac, 33607, France

8     <sup>2</sup> Univ. Bordeaux, CNRS, UMR 5248, European Institute of Chemistry and  
9     Biology, 2 rue Robert Escarpit, Pessac, 33607, France

10    <sup>3</sup> These authors contributed equally to this work

11    <sup>4</sup> Corresponding author

12    \* Correspondence: [mccusker@iecb.u-bordeaux.fr](mailto:mccusker@iecb.u-bordeaux.fr)

13

13 **Abstract**

14 While Rho GTPases are indispensable regulators of cellular polarity, the  
15 mechanisms underlying their anisotropic activation at membranes have been  
16 elusive. Using the budding yeast Cdc42 GTPase module, which includes a  
17 Guanine nucleotide Exchange Factor (GEF) Cdc24 and the scaffold Bem1,  
18 we find that avidity generated via multivalent anionic lipid interactions is a  
19 critical mechanistic constituent of polarity establishment. We identify Cationic-  
20 enriched Lipid Interacting Clusters (CLICs) in Bem1 that drive the interaction  
21 of the scaffold-GEF complex with anionic lipids at the cell pole. This  
22 interaction increases lipid acyl chain ordering, thus contributing to membrane  
23 rigidity and feedback between Cdc42 and the membrane environment.  
24 Sequential mutation of the Bem1 CLIC motifs, PX domain and the PH domain  
25 of Cdc24 lead to a progressive loss of cellular polarity stemming from  
26 defective Cdc42 nanoclustering on the plasma membrane and perturbed  
27 signaling. Our work demonstrates the importance of avidity via multivalent  
28 anionic lipid interactions in the spatial control of GTPase activation.

## 29 Introduction

30 Cellular polarity, the anisotropic organization of cellular constituents, is  
31 essential for basic cellular functions including migration, division and polarized  
32 growth <sup>1</sup>. In diverse eukaryotes, cellular polarity is regulated by GTPases of  
33 the Rho family, including Cdc42 <sup>2-6</sup>. The temporal and spatial control of Cdc42  
34 activity on the plasma membrane ensures the anisotropic activation of the  
35 protein, and thus its function as an essential regulator of cellular polarity.

36 Cdc42 is prenylated at its C-terminus via the covalent addition of an S-  
37 geranylgeranyl group and methylesterification of a cysteine residue <sup>7</sup>. These  
38 modifications, together with juxtaposed polybasic residues, facilitate the high  
39 affinity binding of the GTPase to membrane <sup>8, 9</sup>. While lipid modification  
40 ensures the membrane association of the protein, it is not sufficient to account  
41 for its anisotropic localization <sup>10, 11</sup>. Rather, the enrichment of Cdc42 at the cell  
42 pole is thought to reflect the local activation of the GTPase by its GEF Cdc24  
43 and stabilization of the GEF-Cdc42 complex involving the scaffold Bem1 <sup>12, 13</sup>.

44 How then, are Bem1 and Cdc24 recruited to the plasma membrane to  
45 locally activate Cdc42? Both are peripheral membrane proteins containing a  
46 Pleckstrin-Homology (PH) domain in the case of Cdc24 and a Phox (PX)  
47 domain in Bem1. However, the PH domain in Cdc24 displays no detectable  
48 phosphoinositide specificity *in vitro*, nor is fusion of the PH domain to GFP  
49 sufficient for membrane targeting <sup>14</sup>. These features reflect the low affinity of  
50 the Cdc24 PH domain for phosphoinositides (PI) ( $K_d > 20 \mu\text{M}$  for PI4,5P2, for  
51 example)<sup>14</sup>. The PX domain of Bem1 binds PI3P, PI4P and  
52 phosphatidylserine (PS) *in vitro*. While the affinity of the Bem1 PX domain for

53 PI3P is low ( $K_d > 100 \mu\text{M}$ ), its interaction with PS and PI4P was observed to  
54 be stronger<sup>15, 16</sup>. However, neutralization of a critical arginine required for  
55 electrostatic interactions with anionic lipids within the Bem1 PX domain did  
56 not disrupt Bem1 localization unless additional pathways that guide Cdc42  
57 activation were also blocked<sup>17</sup>. The mechanism accounting for the site-  
58 specific recruitment of these critical Cdc42 regulators to the plasma  
59 membrane therefore represents a key unanswered question.

60 At the plasma membrane of diverse eukaryotes, anionic lipids including  
61 PS, contribute to the net negative charge of the membrane and the  
62 recruitment of peripheral membrane proteins<sup>18, 19</sup>. Moreover, the localization  
63 of a PS reporter is anisotropic with respect to both the lateral plane of the  
64 plasma membrane and the inner leaflet of the membrane<sup>18</sup>. PS has been  
65 shown to play an important role in the anisotropic localization of Cdc42 and  
66 Bem1 in *Saccharomyces cerevisiae*<sup>20, 21</sup>. Work from our lab indicates that PS  
67 is required for the spatial organization of Cdc42 in nanoclusters on the plasma  
68 membrane, whose size correlates with Cdc42 activity. The addition of PS to  
69 wild type cells results in larger Cdc42 nanoclusters at the cell pole in a Bem1-  
70 dependent manner<sup>22</sup>. PS is emerging as a key regulator of nanoclustering in  
71 diverse signaling pathways, including Ras signaling<sup>23-25</sup>. Defining how Cdc42  
72 activators interact with anionic lipids including PS would therefore address  
73 one of the most upstream events during polarity establishment and may  
74 provide insight into more general features of Ras-family signaling that are  
75 conserved among eukaryotes.

76 Here, using complementary quantitative *in vivo* imaging and  
77 reconstitution experiments, we identify a mechanism through which the Cdc42

78 regulators are recruited to anionic lipids. The interaction of Bem1 with PS and  
79 PI4P induces lipid ordering and consequent membrane rigidity. The affinity of  
80 Bem1 for anionic lipids is also sufficient to target the associated GEF to this  
81 membrane environment, while robust membrane targeting of the GEF-scaffold  
82 complex involves multivalent protein-lipid interactions that promote Cdc42  
83 nanoclustering, signaling and cell polarity.

## 84 **Results**

### 85 **PI4P and PS are essential for plasma membrane targeting of Cdc42** 86 **regulators *in vivo*.**

87 The sole PS synthase *CHO1* is not an essential gene in budding yeast,  
88 whereas the anisotropic localization of Cdc42 is essential, suggesting that  
89 other lipids may compensate for the lack of PS in *cho1Δ* cells to promote  
90 Cdc42 polarization. Recent work uncovered a mechanism of PS transport  
91 from the ER to the plasma membrane involving the counter transport of PI4P  
92 in the opposite direction<sup>26, 27</sup>. Thus, it is possible that plasma membrane PI4P  
93 levels may be elevated in *cho1Δ* cells, prompting us to examine whether this  
94 PI4P pool could account for the residual Cdc42 localization in the *cho1Δ*  
95 mutant.

96 First, we examined the localization of Bem1-GFP in *cho1Δ* cells and  
97 confirmed that the percentage of cells displaying polarized Bem1-GFP was  
98 reduced compared to a wild type (WT) control population (26% cells with  
99 polarized Bem1-GFP in *cho1Δ*, 71% in WT; Fig. 1a, b)<sup>21</sup>. In addition, the  
100 fluorescence intensity of Bem1-GFP was also reduced at the pole of those  
101 *cho1Δ* cells that displayed polarized Bem1-GFP (Supplementary Fig. 1a). We

102 reasoned that the residual cohort of *cho1Δ* cells might display polarized  
103 Bem1-GFP due to elevated PI4P levels, since PI4P would be predicted to  
104 accumulate at the plasma membrane in the *cho1Δ* mutant as a consequence  
105 of reduced PI4P-PS exchange. Consistent with this reasoning, and with the  
106 previously reported elevated global PI levels in *cho1Δ* cells detected by mass  
107 spectrometry <sup>21</sup>, we observed an approximately 2.5-fold increase in the  
108 intensity of a PI4P probe by quantitative imaging in *cho1Δ* cells (Fig. 1c, d).  
109 Next, the levels of plasma membrane PI4P and PS were ablated by  
110 appending an auxin-inducible degron to the PI-4-kinase Stt4 in the *cho1Δ*  
111 mutant <sup>28, 29</sup>. As expected, the double mutant was sensitive to the presence of  
112 auxin and choline in the media (Supplementary Fig. 1b, c). Quantitative  
113 imaging indicated reduced plasma membrane levels of a PI4P probe upon  
114 auxin treatment (Supplementary Fig. 1d, e). In addition, the levels of 9XMyc-  
115 AID-stt4 were reduced after auxin treatment, consistent with its degradation  
116 (Supplementary Fig. 1f). The percentage of cells displaying polarized Bem1-  
117 GFP when PI4P and PS were ablated dropped from 25% to 3%. Upon PS and  
118 PI4P attenuation, Bem1-GFP accumulated in puncta in 55% of cells (Fig. 1e  
119 and f). Simultaneous imaging of the GEF Cdc24-mCherry and Bem1-GFP  
120 indicated that the Bem1-GFP puncta also contained the GEF, reflecting  
121 association of the two proteins in a protein complex (Fig. 1g and h). These  
122 results underscore the key role of PS and plasma membrane PI4P in the  
123 localization of Bem1 and Cdc24 *in vivo*, and the importance of these anionic  
124 lipids in the spatial control of Cdc42 activity.

125 **Identification of a robust anionic lipid targeting sequence in Bem1.**

126 Previously, the PX domain of Bem1 was shown to interact directly with anionic  
127 lipids; however, it is unknown whether the interaction is sufficiently robust to  
128 target the full-length protein to these lipids<sup>15, 16</sup>. We established liposome  
129 floatation assays to address this question. In the assay, liposomes were  
130 mixed with Bem1 purified from bacteria and floated through dense sucrose. In  
131 the event of a sufficiently strong interaction, the protein is found in the  
132 supernatant, associated with the liposomes (Fig. 2a). A panel of neutral to  
133 anionic lipids were tested. While BSA did not interact appreciably with any of  
134 the lipids (Supplementary Fig. 2a), Bem1 displayed a robust interaction with  
135 anionic liposomes. Strikingly, liposomes containing 20% PS, 5% PI4P and 75  
136 % PC, mimicking the composition of the plasma membrane (PM lipids),  
137 recruited around 93% of the Bem1 in the assay, indicating that the full-length  
138 protein binds strongly to these lipids in the absence of additional proteins (Fig.  
139 2b).

140 The region of Bem1 responsible for the PS-PI4P lipid interaction was  
141 next mapped (Fig. 2c). While the PX domain interacted weakly with PM lipids  
142 in the assay (16% floatation), an N-terminal 72 amino acid sequence  
143 interacted more strongly with this lipid mix (41% floatation)(Fig. 2d, mauve  
144 bar). The sequence was enriched in clusters of basic residues that we refer to  
145 as a Cationic-enriched Lipid Interacting Clusters (CLICs). We next addressed  
146 the mechanism through which the CLICs interact with PM lipids by mixing  
147 liposomes with the CLICs and analyzing the interaction using <sup>2</sup>H solid-state  
148 NMR spectroscopy. Strikingly, the CLICs had a structural impact on the entire  
149 length of the lipid acyl chain, increasing the degree of order in the 14 carbon  
150 atoms of the lipid PC acyl chain in the presence of PS and PI4P, while the

151 acyl chains in liposomes containing only PC remained unaffected by the  
152 CLICs (Fig. 2e). These results indicate that Bem1 interacts with anionic lipids  
153 via anionic lipid interacting motifs, and in doing so, Bem1 in turn increases  
154 ordering along the length of the acyl chain backbone in a reciprocal fashion.

155 **The Bem1 CLIC motifs can act as a heterologous plasma membrane**  
156 **targeting signal *in vivo*.**

157 The N-terminus of Bem1 contains 3 clusters of basic residues, or CLIC motifs,  
158 totaling 14 lysine and arginine residues. We mutated each cluster individually  
159 or all 14 residues simultaneously (Fig. 3a). We first performed liposome  
160 floatation assays to identify the CLIC motif that contributed most to Bem1  
161 anionic lipid targeting. Of the 3 clusters of basic residues, the most N-terminal  
162 CLIC-1 cluster appeared to be the most important (Fig. 3b). In addition,  
163 mutation of all basic residues to alanine (*clic-14A*) or a charge swap to  
164 glutamate (*clic-14E*) strongly attenuated the interaction of these full-length  
165 Bem1 constructs with PM lipids *in vitro*. We next verified that the resulting *clic-*  
166 *14E* mutant protein retained the ability to boost Cdc24 GEF activity in a GEF  
167 assay, and had thus not been non-specifically damaged by the charge-swap  
168 mutations. This FRET-based mant-GTP loading assay serves as a sensitive  
169 readout for Bem1 function, since Bem1 boosts GEF activity via interactions  
170 with Cdc24 and Cdc42 that are distinct from the N-terminal CLIC motifs<sup>30-32</sup>.  
171 The *clic-14E* mutant was chosen for these experiments because it was  
172 expressed at similar levels to wild type Bem1 *in vivo*, as demonstrated below.  
173 In these assays, the *bem1 clic-14E* mutant and wild type Bem1 boosted  
174 Cdc24 GEF activity indistinguishably, consistent with the idea that the *clic*



175 mutations had not resulted in non-specific Bem1 mis-folding, (Fig. 3c and  
176 Supplementary Fig. 2b).

177         The CLIC motifs in Bem1 are necessary for the interaction with anionic  
178 lipids, but are they sufficient? We tested whether a single CLIC motif in Bem1  
179 was sufficient for heterologous targeting of proteins to the plasma membrane  
180 *in vivo*. The viability of budding yeast requires a Cdc42 C-terminal polybasic  
181 sequence containing 4 lysines that interact with anionic lipids, providing an *in*  
182 *vivo* system in which to test the functional importance of a single CLIC motif<sup>9</sup>.  
183 We generated budding yeast in which the wild type copy of *CDC42* was  
184 expressed from the conditional *GAL1* promoter. Expression of wild type  
185 *CDC42* was repressed by plating cells on dextrose and then we tested  
186 whether the most N-terminal Bem1 CLIC-1 motif could support the viability of  
187 the *cdc42* polybasic mutant when engineered onto the C-terminus of *cdc42*  
188 immediately preceding the geranylgeranylation site. While the *cdc42*  
189 polybasic mutant was unable to support cellular viability when grown on  
190 dextrose, as indicated by the lack of colony growth on dextrose plates (Fig.  
191 3d, blue box), appending the Bem1 CLIC-1 motif to this mutant restored  
192 viability, albeit with a reduced rate of colony formation compared to wild type  
193 control cells (Fig. 3d, red box). Control experiments indicated that the loss of  
194 *CDC42* function required mutation of all 4 C-terminal lysines (Supplementary  
195 Fig. 2c). The CLIC-1 motif was also sufficient to target the polybasic *cdc42*  
196 mutant to the plasma membrane in an anisotropic manner (Fig. 3e, red box).  
197 These results indicate that the CLIC motifs are necessary for the strong  
198 interaction between Bem1 and anionic lipids in the reconstituted assay, and  
199 that the affinity of the single CLIC-1 motif for these lipids is sufficient to

200 support viability when heterologously appended to a *cdc42* lipid-binding  
201 mutant *in vivo*.

202 **The Bem1 CLIC sequence is required for Bem1 targeting to the cell pole**  
203 ***in vivo*.**

204 We next addressed the importance of the anionic lipid targeting CLIC motifs  
205 within Bem1 *in vivo*. Since previous work demonstrated that the PX domain in  
206 Bem1 was only important for the localization of the protein when additional  
207 pathways that guide polarity were also inactivated<sup>17</sup>, we reasoned that the PX  
208 domain may function with the CLIC motifs in a multivalent fashion to confer  
209 robust membrane targeting. The importance of the CLIC and PX membrane  
210 targeting sequences were tested *in vivo* by replacing the wild type copy of  
211 *BEM1* with the *bem1 clic-14E* mutant, a *bem1 px* domain mutant (K338M,  
212 K348A, R349A, R369A)<sup>15</sup>, or a mutant in which both sequences were  
213 mutated. As a measure of Bem1 function, the rate of colony formation at 37°C  
214 was observed, since *bem1Δ* cells display a growth defect at this temperature  
215 that has been attributed to defective organization of the actin cytoskeleton<sup>33</sup>,  
216<sup>34</sup>. While the *bem1 px* mutant displayed a rate of colony formation  
217 indistinguishable from wild type cells, the *bem1 clic-14E* mutant displayed a  
218 reduced rate, which was exacerbated in the double *bem1-14E px* mutant (Fig.  
219 4a). The mutant proteins were not non-specifically destabilized by the  
220 mutations, since 3xHA-tagged mutants were expressed comparably to wild  
221 type Bem1-3xHA (Fig. 4b).

222 The percentage of cells displaying polarized GFP fluorescence was  
223 reduced in the *bem1 clic-14E-GFP* mutant compared to wild type, and even

224 more diminished in the *bem1 clic-14E px-GFP* double mutant (77% wild type,  
225 49% *clic-14E* and 41% *clic-14E px* double mutant, Fig. 4c, d). Moreover, the  
226 intensity of GFP fluorescence at the pole in single cells indicated that all three  
227 mutants displayed significantly reduced levels of GFP signal compared to wild  
228 type cells (Fig. 4e). These results, which are consistent with our reconstitution  
229 experiments, identify the importance of the CLIC motifs in targeting Bem1 to  
230 the cell pole *in vivo*.

231 **Multivalent protein-lipid interactions drive avid targeting of the GTPase**  
232 **module to anionic lipids *in vitro* and *in vivo*.**

233 Previous work reported that the GEF Cdc24 is targeted to, but not maintained  
234 at the pole in *bem1Δ* mutants<sup>12</sup>. Conversely, Bem1 polarization is not  
235 maintained in *cdc24* mutants<sup>12</sup>, suggesting that Cdc24 may display some  
236 affinity for lipids *in vivo*, likely via its PH domain<sup>14</sup>. This led us to test whether  
237 multivalent protein-lipid interactions in Bem1 and Cdc24 may drive recruitment  
238 of the GEF-scaffold complex to the pole (Fig. 5a). First, we tested whether  
239 Cdc24 has appreciable affinity for anionic lipids in the liposome floatation  
240 assay. Approximately 33% of Cdc24 interacted with PM lipids in the assay,  
241 and the association was reduced to around 15% when a mutation was  
242 introduced into a conserved cationic residue in the beta-2 sheet of the PH  
243 domain (*cdc24* K513A, which we refer to as *cdc24 ph*)(Fig. 5b and  
244 Supplementary Fig. 2e)<sup>35</sup>. The addition of Bem1 dramatically increased the  
245 amount of Cdc24 associated with PM lipids from 33% to more than 88% (Fig.  
246 5c). While mutation of the CLIC motifs in Bem1 had the strongest impact on  
247 Cdc24 association with PM lipids, successive neutralization of the CLIC and  
248 PX motifs in Bem1, combined with mutation of the PH domain in Cdc24

249 resulted in a progressive reduction in the interaction of Cdc24 with PM lipids  
250 (Fig. 5c). We directly tested whether avidity is generated via multivalent  
251 interactions by varying the concentration of Bem1 and plotting the amount of  
252 Cdc24 associated with PM lipids (Fig. 5d). Fitting the curves with an  
253 equilibrium-binding model revealed that the  $K_d$  of Cdc24 for anionic lipids was  
254 acutely sensitive to Bem1 lipid binding. The apparent  $K_d$  of Cdc24 for PM  
255 lipids in the presence of wild type Bem1 was 6 nM, 117 nM in the *bem1 clic-*  
256 *14A* mutant and 180 nM in the *bem1 clic-14A px* mutant. These results  
257 indicate that multivalent lipid binding motifs in Bem1, conferred by the CLIC  
258 motifs and PX domain, contribute to the avid targeting of Cdc24 GEF activity  
259 to anionic lipids in the reconstituted system. Of these interactions, the CLIC  
260 motifs that we identify in Bem1 provide the strongest anionic lipid targeting to  
261 the GEF-scaffold complex. These results are consistent with a model of GEF-  
262 scaffold targeting via multivalent anionic lipid avidity.

263 The multivalent avidity model was next tested *in vivo*. Mutation of the  
264 Bem1 CLICs, PX domain and the Cdc24 PH domain resulted in a  
265 progressively more pronounced temperature sensitive phenotype (Fig. 5e).  
266 Importantly, by appending a geranylgeranylation sequence to these mutants,  
267 it was possible to restore growth at 37°C, indicating that temperature  
268 sensitivity was a result of reduced membrane targeting and not non-specific  
269 protein mis-folding due to mutation (Supplementary Fig. 2d). Morphological  
270 defects consistent with a loss of cell polarity in the mutants also became more  
271 severe as additional mutations in the identified lipid tethering motifs were  
272 combined, even at 25°C (Fig. 5f). We addressed whether the loss of cellular  
273 polarity observed *in vivo* was associated with specific Cdc42 signaling

274 pathway defects. Cdc24 multi-site phosphorylation by the p21 Activated  
275 Kinase (PAK) Cla4 occurs optimally in the presence of Bem1 when Cdc24 is  
276 localized on the plasma membrane<sup>12, 31, 36, 37</sup>. We therefore predicted that  
277 Cdc24 might display aberrant phosphorylation in the GEF-scaffold lipid-  
278 binding mutants. Consistently, Cdc24 phosphorylation was observed to be  
279 dramatically reduced in the *bem1 clic-14E* mutant, and all combinations  
280 thereof, as indicated by the increased hypophosphorylated form of Cdc24 in  
281 electrophoretic mobility shifts during SDS-PAGE (Fig. 5g). These results  
282 indicate that the CLIC motifs identified in Bem1 and the multivalent anionic  
283 lipid interactions displayed by the GEF-scaffold complex are required for the  
284 spatial control of Cdc42 activation, signaling via PAK, and the ensuing control  
285 of cellular polarity.

286 **Scaffold tethering to anionic lipids affects Cdc42 dynamics and**  
287 **activation *in vivo*.**

288 The loss of cell polarity ensuing from reduced Bem1 tethering to the plasma  
289 membrane suggested that Cdc42 dynamics would be altered in the *bem1 clic-*  
290 *14E* mutant. At the cell pole in wild type cells, Cdc42 displays reduced  
291 diffusion compared with elsewhere on the plasma membrane, reflecting  
292 activation of Cdc42 at the cell pole<sup>22, 38</sup>. Previous work from our lab  
293 demonstrated that Bem1, which boosts Cdc42 activation<sup>31</sup>, and PS, which  
294 recruits Cdc42 activators, contribute to the reduced diffusion and  
295 nanoclustering of Cdc42 at the pole<sup>22</sup>. We therefore reasoned that the  
296 reduced rate of Cdc42 diffusion and its nanoclustering at the pole may be  
297 linked to the lipid rigidification exerted by the Bem1 CLIC motifs. To test this

298 hypothesis, we monitored mEOS-Cdc42 dynamics in live wild type, *bem1 clic-*  
299 *14E* and *bem1 clic-14E px* mutant cells by single particle tracking  
300 Photoactivation Localization Microscopy (sptPALM)(Fig 6a). From high-  
301 frequency sptPALM acquisitions (50 Hz), trajectories were obtained from  
302 mEOS-Cdc42 at the pole and non-pole regions of cells. The mean square  
303 displacement of the protein, which is a measure of Cdc42 mobility, was  
304 extracted from the assembled single molecule tracks. In wild type cells,  
305 mEOS-Cdc42 displayed more confinement at the pole than at the non-pole,  
306 as expected. However, reduced mobility of mEOS-Cdc42 was not observed at  
307 the pole of *bem1 clic-14E* and *bem1 clic-14E px* mutants (Fig. 6b). This was  
308 also borne out quantitatively by calculating the diffusion coefficient, D, from  
309 the slope of the MSD curves (Fig. 6c). We next fixed cells and looked at the  
310 organization of mEOS-Cdc42 by PALM. Whereas mEOS-Cdc42 nanoclusters  
311 were larger at the pole of wild type cells, we observed no difference in the size  
312 of mEOS-Cdc42 nanoclusters between the pole and non-pole of *bem1 clic-*  
313 *14E px* mutant cells (Fig. 6d, e). These results indicate that the interaction  
314 between the CLIC motifs in Bem1 and anionic lipids, which rigidifies the lipid  
315 acyl chain, is required for the reduced diffusion of Cdc42 and its organization  
316 in large nanoclusters at the pole. In order to directly link the alteration in  
317 Cdc42 nanoclustering with Bem1 lipid tethering and Cdc42 activation, we  
318 monitored Cdc42-GTP levels by quantitative imaging using a *gic2*<sub>(1-208)</sub>-yeGFP  
319 probe, which contains a CRIB motif that interacts with the active GTPase. The  
320 levels of the probe were reduced in the *bem1 clic-14E* and *clic-14E px* mutant  
321 compared to a wild type control (Fig. 6f). Collectively, these results indicate  
322 that Bem1 lipid tethering via the CLIC motifs is required for three key

323 properties of Cdc42 at the cell pole: its reduced diffusion, its organization in

324 large nanoclusters and its optimal activation.

325

326

## 327 **Discussion**

328 The mechanisms underlying the targeting of the Cdc42 regulators Bem1 and  
329 Cdc24 to the plasma membrane represent a longstanding enigma, despite the  
330 budding yeast polarity system being one of the most intensively studied  
331 among eukaryotes. Previous studies in diverse experimental models have  
332 highlighted a crucial role for positive feedback in amplifying the levels of active  
333 polarity factors at the cell pole during polarity axis establishment<sup>39-43</sup>. In  
334 budding yeast, Bem1 is proposed to play a role in this feedback<sup>44-46</sup>;  
335 however, the mechanisms that localize Bem1 to the plasma membrane to  
336 trigger the positive feedback have been enigmatic. Combining the rapid  
337 ablation of plasma membrane lipids *in vivo* with a sensitive reconstituted  
338 system and solid-state NMR spectroscopy, we identify a mechanism  
339 underlying the spatial tethering of Bem1 and the GEF Cdc24 to anionic lipids  
340 enriched at the cell pole. The interaction between Bem1 and anionic lipids is  
341 reciprocal in that Bem1 induces the ordering of lipid acyl chains, rigidifying the  
342 local membrane environment (Fig. 7). In a wider context, our work also  
343 identifies the critical role of multivalent protein-lipid interactions in the control  
344 of cellular polarity.

345 Previous studies identified an important role for the anionic lipid PS in  
346 the anisotropic plasma membrane recruitment of Cdc42 and its regulator  
347 Bem1, although the underlying mechanism was unknown<sup>21</sup>. While the PX  
348 domain of Bem1 interacts with PS *in vitro*, mutation of the relevant cationic  
349 residues in the Bem1 PX domain did not result in a phenotype unless  
350 additional pathways that guide polarity were also inactivated *in vivo*<sup>15, 17</sup>. It  
351 was therefore unknown if additional lipid binding sites existed in Bem1. We



352 demonstrate that Bem1 does indeed employ a second anionic lipid region  
353 composed of CLIC motifs, which together with the PX domain, mediates the  
354 robust interaction of Bem1 with negatively charged lipids.

355         Five lines of evidence support the involvement of the CLIC motifs in the  
356 anionic lipid targeting of Bem1. First, mutation of the cationic residues that  
357 constitute the motifs dramatically reduced the affinity of Bem1 for these lipid  
358 species in a reconstituted system. Second, a CLIC motifs construct was  
359 sufficient to interact with liposomes mimicking plasma membrane lipid  
360 composition. Third, appending a single *CLIC* motif to a *cdc42* mutant that is  
361 defective in anionic lipid recruitment is sufficient to restore viability to this  
362 otherwise lethal mutant *in vivo*. Fourth, mutation of the *CLIC* motifs reduces  
363 the localization of Bem1 to the cell pole at a population and at a single cell  
364 level *in vivo*. Finally, as discussed below, solid-state NMR data indicate a  
365 specific interaction between Bem1 and anionic lipids.

366         Anionic lipids recruit Bem1 and this interaction in turn induces ordering  
367 of the lipid acyl chain backbone in a PS-PI4P-dependent manner, increasing  
368 membrane rigidity. Upon recruitment of Bem1 to anionic lipids, the interaction  
369 of the CLIC motifs with these lipids decreases membrane fluidity, likely  
370 reducing the diffusion of Cdc42 GTPase components locally. In eukaryotes,  
371 diverse Ras-family GTPases display heterogeneous diffusion on the plasma  
372 membrane, where active GTPases and other signaling proteins have been  
373 imaged in discrete sub-diffraction limited ensembles, also referred to as  
374 nanoclusters<sup>24, 25, 47-52</sup>. Cdc42 is organized in nanoclusters that are larger at  
375 the cell pole<sup>22</sup>, where Bem1 contributes to GTPase activation<sup>31</sup>. These larger  
376 nanoclusters at the pole require Bem1 and phosphatidylserine. Indeed,

377 exogenous addition of PS is sufficient to induce the organization of Cdc42 into  
378 large nanoclusters, but only if Bem1 is present <sup>22</sup>. We therefore propose that  
379 Bem1-dependent Cdc42 nanoclustering via PS is likely to be mediated by the  
380 CLIC motifs in Bem1. The increased membrane rigidity generated by CLIC-  
381 like sequences in other proteins, combined with the potential of PS to span  
382 the two leaflets of the lipid bilayer <sup>23</sup>, may constitute critical ingredients for  
383 nanocluster-mediated signaling on the plasma membrane.

384 Taking advantage of the newly identified CLIC motifs as a starting  
385 point, we addressed more generally the mechanistic basis of GEF-scaffold  
386 anionic lipid targeting. We identified multivalency in the protein-lipid  
387 interactions as a critical constituent of avid GTPase module targeting to the  
388 plasma membrane. Intuitively, multivalency as a means of avid protein  
389 targeting is appealing, since multiple juxtaposed ligand binding sites in a  
390 target have the potential to confer multiplicative rather than additive affinity <sup>53</sup>.  
391 Consistently, a previous study demonstrated that the electrostatic-based  
392 interaction of N-WASP with PIP<sub>2</sub> is multivalent, and that this contributes to  
393 both the cooperativity of this protein-lipid interaction and to the ultrasensitive,  
394 switch-like kinetics of actin polymerization <sup>54</sup>. Since polarity establishment is  
395 also a switch-like phenomenon, it is feasible that cooperativity in the Bem1-  
396 lipid interaction may contribute to these properties. Multivalent protein-lipid  
397 interactions also underlie Par polarity complex localization to anionic lipids at  
398 the cortex, where basic-hydrophobic domains resemble the CLIC motifs that  
399 we identify in Bem1 <sup>55</sup>. Similarly, multivalent protein-lipid interactions play a  
400 role in the recruitment of dynamin, EEA1, retromer and ESCRT-III complexes  
401 to membranes <sup>56-59</sup>. Future experiments examining the degree of lipid

402 penetration by the membrane targeting signals in these proteins are  
403 warranted to understand whether they too change the local membrane  
404 environment.

405           In the case of the Cdc42 module in budding yeast, additional peripheral  
406 membrane proteins associated with Cdc24 and Bem1 are likely to contribute  
407 additional multivalent effects. For example, both Boi1 and Boi2, which interact  
408 with Bem1 and Cdc24, each contain a PH domain, as do Cdc42 GAPs<sup>37, 60,</sup>  
409<sup>61</sup>. These proteins may increase the avidity of the Cdc42 GTPase module for  
410 PS-PI4P further, or, if their affinity for other lipid species is sufficient, they may  
411 contribute additional lipid-specific targeting functions to the GTPase module.

412

413

## 413 **Methods**

### 414 **Plasmid construction**

415 Bem1 expression plasmids were generated using a modified pGEX6P-2  
416 backbone in which the BamHI site in the multiple cloning site was changed to  
417 NdeI. Full-length Bem1 and the truncated proteins were amplified by PCR,  
418 introducing NdeI and XhoI restriction sites and cloned into the modified  
419 pGEX6P-2 vector to generate pDM256, pDM548, pDM514, pDM516 and  
420 pDM577, respectively. The *clic* mutants (*clic-1*, *clic-2*, *clic-3*, *clic-14A* and *clic-*  
421 *14E*) were synthesized with NdeI and BamHI restriction sites (Bio-Basic,  
422 Markham, Canada). The NdeI/BamHI fragments were cloned into the modified  
423 pGEX6P-2 vector to generate pDM602 (*clic-1*), pDM604 (*clic-2*), pDM599  
424 (*clic-3*), pDM600 (*clic-14A*) and pDM890 (*clic-14E*).

425 *BEM1*, *bem1 clic-14E* and *bem1 clic-14E px* constructs were cloned into a  
426 yeast integrating plasmid (pRS306) containing 0.4 Kb upstream of the *BEM1*  
427 start codon and 0.143 Kb downstream of the stop codon. The *BEM1* coding  
428 sequence and mutants were ligated as XhoI–EagI fragments, generating  
429 pDM865, pDM906 and pDM947, respectively.

430 Supplementary Table 1 contains a list of the plasmids used in this study.

### 431 **Yeast strains and growth conditions**

432 The *cho1* $\Delta$  strains were generated by replacing the *CHO1* gene with kanMX6-  
433 or hphNT1- selectable markers<sup>62, 63</sup>. For experiments employing the *cho1*  
434 mutant, minimal medium supplement with 1  $\mu$ M choline was used, except

435 where noted. *cho1* $\Delta$  strains were routinely tested to ensure choline  
436 auxotrophy<sup>64</sup>.

437 The AID-stt4 strains were generated as follows: pDM589 was digested  
438 using PmeI to release *TIR1* for integration at *LEU2*. Next, pDM585 was used  
439 to generate *pKan-pCUP1-9xMyc-AID-stt4* for Stt4 N-terminal tagging by  
440 homologous recombination. Transformants were tested for auxin sensitivity  
441 and verified by pcr and DNA sequencing.

442 The *bem1 px* mutant (K338M, K348A, R349A & R369A) was generated  
443 by directed mutagenesis of pDM256. The *bem1 px* coding sequence was then  
444 amplified by pcr and transformed into a *bem1* $\Delta$ ::*CaURA3* strain (DMY2179).  
445 Transformants were selected for loss of the *URA3* marker on 5-FOA and  
446 integration of the *bem1 px* mutant was verified by PCR and sequencing,  
447 yielding DMY2199.

448 *BEM1*, *bem1 clic-14E* and *bem1 clic-14E px* strains were generated  
449 using the pop-in-pop-out strategy<sup>65</sup>. In the first pop-in step, pDM865, pDM906  
450 and pDM947 were linearized by digestion with an enzyme recognizing a  
451 restriction site within the *BEM1* or *bem1* ORF, then transformed into  
452 DMY2105 and selected on SC -URA for recombination at the *BEM1* locus. In  
453 the pop-out step, homologous recombination between the wild type *BEM1*  
454 and juxtaposed *bem1* mutant occurs randomly, generating some  
455 transformants in which the wild type or mutant *bem1* sequence is present at  
456 the *BEM1* locus. After counter selection against *URA3* on 5FOA media,  
457 transformants containing untagged *BEM1* or *bem1* at the genomic locus were  
458 identified by PCR and DNA sequencing.

459 The *cdc24 K513A-3xHA* mutant was generated by directed  
460 mutagenesis of pDM032, generating pDM737. The wild type or mutant *cdc24*  
461 *K513A-3xHA* were then integrated at the endogenous *CDC24* locus and  
462 checked by PCR, sequencing and western blotting using anti-HA antibodies.  
463 Supplementary Table 2 contains a list of the yeast strains used in this study.

#### 464 **Protein expression and purification**

465 GST-Bem1, Cdc24-6xHis and derivative mutants were expressed and purified  
466 from BI21-CodonPlus (DE3) cells, essentially as previously described <sup>31</sup>.  
467 Briefly, cells were grown in terrific broth at 37 °C until an OD<sub>600nm</sub> ~3.  
468 Expression was induced by the addition of IPTG to 0.3 mM for Bem1 and 0.8  
469 mM for Cdc24, after which cells were grown overnight at 18 °C. Cells were  
470 then harvested and flash frozen in liquid nitrogen. The cell pellets were  
471 subsequently ground to a fine powder in a chilled coffee grinder.

472 For purification of Cdc24-6xHis, room temperature lysis buffer (50 mM  
473 Tris-HCL (pH = 8.0), 1 M NaCl, 5 mM imidazole, 5% glycerol, 0.1% tween)  
474 supplemented with EDTA-free Protease inhibitor cocktail (Roche, Basel,  
475 Switzerland) and 1 mM freshly prepared PMSF was added to the chilled  
476 bacterial powder. After sonication on ice, the lysate was centrifuged at  
477 70,000x g for 1 hour and the supernatant was loaded on a Ni<sup>2+</sup>-IMAC  
478 column. Beads were washed with 50 mM Tris-HCL (pH = 8.0), 1 M NaCl, 20  
479 mM imidazole, 5% glycerol, 0.1% tween and Cdc24-6xHis was eluted with 20  
480 mM Tris-HCL (pH = 8.0), 300 mM NaCl, 500 mM imidazole. Cdc24-6xHis was  
481 extensively dialysed (50 mM Tris-HCL (pH = 8.0), 150 mM NaCl) then flash  
482 frozen in liquid nitrogen for storage. The same protocol was used to purify

483 bem1 CLICs-6xHis, except that the lysis buffer was modified (50 mM Tris-  
484 HCL (pH = 7.5), 1 M NaCl, 5 mM imidazole, 5% glycerol, 0.5% tween). The  
485 protein was analyzed on a 16% Tris-tricine gel <sup>66</sup>.

486 For GST-Bem1 purification, a modified lysis buffer was used (50 mM  
487 Tris- HCL (pH = 7.5), 1 M NaCl, 0.1% Tween-20 and 5 mM DTT, EDTA-free  
488 Protease inhibitor cocktail and 1 mM freshly prepared PMSF). The lysate was  
489 sonicated, centrifuged as above and the supernatant was added to  
490 glutathione agarose beads for 2 hours in batch. After extensive washing (50  
491 mM Tris-HCL (pH = 7.5), 250 mM KCl, 0.05% Tween-20 and 0.5 mM DTT),  
492 the beads were equilibrated in 3C protease buffer (50 mM Hepes (pH = 7.6),  
493 250 mM KCl, 0.05% Tween-20 and 0.5 mM DTT). The GST tag was digested  
494 directly on the glutathione agarose using the same buffer, supplemented with  
495 rhinovirus 3C protease. The flow-through, containing untagged Bem1, was  
496 dialysed extensively in 50 mM Tris-HCL (pH = 7.5), 150 mM NaCl then flash  
497 frozen in liquid nitrogen for storage.

498 Cdc42 lacking the C-terminal CAAX sequence was tagged with 10xHis and  
499 expressed and purified from BI21-CodonPlus (DE3) cells. Room temperature  
500 lysis buffer (50 mM Tris-HCL (pH = 7.5), 1 M NaCl, 25 mM imidazole),  
501 supplemented with EDTA-free Protease inhibitor cocktail (Roche, Basel,  
502 Switzerland) and 1 mM freshly prepared PMSF was added to bacterial  
503 powder. The lysate was stirred, sonicated and centrifuged as described  
504 above, and the supernatant was loaded onto a Ni<sup>2+</sup>-IMAC column. The  
505 column was washed in 50 mM Tris-HCL (pH = 7.5), 1 M NaCl, 25 mM  
506 imidazole, and Cdc42-10xHis was eluted in 20 mM Tris-HCL (pH = 7.5), 300  
507 mM NaCl and 250 mM imidazole. To obtain nucleotide-free Cdc42, the protein

508 was dialysed in 20 mM Tris-HCL (pH = 7.5), 150 mM NaCl, 5% glycerol  
509 supplemented with 25mM EDTA, then dialyzed extensively (20 mM Tris-HCL  
510 (pH = 7.5), 150 mM NaCl, 5% glycerol). Samples were flash frozen in liquid  
511 nitrogen for storage.

## 512 **Liposome preparation**

513 Liposomes were prepared freshly from lipid stocks (Avanti Polar Lipids Inc.,  
514 Alabaster, USA). The origin and composition of the lipids is provided in  
515 Supplemental Table 3. Lipids dissolved in chloroform were lyophilized for 15  
516 minutes at 45 °C to evaporate the chloroform. Lipids were washed in 50 µL  
517 ultra-pure water and lyophilized until dry. Lipids were then resuspended in 20  
518 mM Tris (pH = 7.5), 150 mM NaCl to have a final lipid concentration of 2 mM.  
519 After 6 cycles of freeze-thaw in liquid nitrogen and at 45°C in a water bath,  
520 liposomes were sonicated for 15 minutes in a bath sonicator. This method  
521 yielded monodisperse preparations of ~100 nm diameter liposomes, as  
522 assessed by dynamic light scattering.

## 523 **Liposome floatation assays**

524 The final concentration of liposomes was 0.5 mM in floatation experiments,  
525 while protein was 2 µM unless indicated differently. Liposomes were mixed  
526 with buffer alone (20 mM Tris (pH = 7.5), 150 mM NaCl), or with protein, in a  
527 final volume of 150 µL in a 500 µL polycarbonate ultracentrifuge tube. The  
528 mixtures were incubated at room temperature for 30 minutes. 100µL of a 75  
529 % sucrose solution was mixed with the protein-liposome mixture to give a final  
530 sucrose concentration of 30%, which was gently overlaid with 200 µL of 25%  
531 sucrose. Finally, 50 µL of 20 mM Tris (pH = 7.5), 150 mM NaCl was overlaid



532 to give a final volume of 500  $\mu$ L. Tubes were centrifuged for 1 hour at 23°C at  
533 120,000x g. 100  $\mu$ L of supernatant and 200  $\mu$ L of pellet were precipitated in  
534 10% Tri-Chloroacetic Acid. The pellet was resuspended in 15  $\mu$ L of SDS-  
535 PAGE sample buffer (65 mM Tris-HCl (pH = 6.8), 2% SDS, 10% glycerol, 5%  
536  $\beta$ -mercapto ethanol, 100 mM  $\beta$ -glycerophosphate, 50 mM sodium fluoride),  
537 boiled for 5 minutes, analyzed by SDS-PAGE and stained with Coomassie  
538 brilliant blue R250. The intensity of the protein bands in the supernatant and  
539 pellet were analyzed using a Bio-Rad Gel Doc system running Image Lab  
540 software.

541 The percentage of floating protein was calculated using the equation:

542  $\left\{ \frac{\text{Supernatant}^{\text{band intensity}}}{\text{Supernatant}^{\text{band intensity}} + \text{Pellet}^{\text{band intensity}}} \right\} * 100$

### 543 **Solid-state NMR spectroscopy**

544 Liposomes containing DMPC-d54, DMPS and brain PI(4)P were prepared by  
545 mixing powders in organic solvent (chloroform/methanol, 2:1) in the presence  
546 or absence of the Bem1 CLIC motifs (amino acids 1-72) and adjusting the  
547 lipid/protein ratio (25:1). Solvent was evaporated under a flow of N<sub>2</sub> to obtain  
548 a thin lipid film. Lipids were rehydrated with ultrapure water before  
549 lyophilisation. The lipid powder was hydrated with an appropriate amount of  
550 deuterium-depleted water (80 % hydration ratio) and homogenized by three  
551 cycles of vortexing, freezing (liquid nitrogen, -196°C, 1 min) and thawing  
552 (40°C in a water bath, 10 min). This protocol generated a milky suspension of  
553 micrometer-sized multilamellar vesicles.

554 <sup>2</sup>H NMR spectroscopy experiments were performed using a Bruker  
555 Avance II 500 MHz WB (11.75 T) spectrometer. <sup>2</sup>H NMR spectroscopy

556 experiments on  $^2\text{H}$ -labelled DMPC were performed at 76 MHz with a phase-  
557 cycled quadrupolar echo pulse sequence ( $90^\circ\text{x-t-}90^\circ\text{y-t-acq}$ ). Acquisition  
558 parameters were as follows: spectral window of 500 kHz for  $^2\text{H}$  NMR  
559 spectroscopy,  $p/2$  pulse width of 3.90 ms for  $^2\text{H}$ , interpulse delays (t) were of  
560 40 ms, recycled delays of 2 s for  $^2\text{H}$ ; 3000 scans were used for  $^2\text{H}$  NMR  
561 spectroscopy. Spectra were processed using a Lorentzian line broadening of  
562 300 Hz for  $^2\text{H}$  NMR spectra before Fourier transformation from the top of the  
563 echo. Samples were equilibrated for 30 min at a given temperature before  
564 data acquisition. All spectra were processed and analyzed using Bruker  
565 Topspin 3.2 software. Spectral moments were calculated for each  
566 temperature using the NMR Depaker 1.0rc1 software [Copyright (C) 2009  
567 Sébastien Buchoux]. Orientational order parameters ( $S_{\text{CD}}$ ) were calculated  
568 from experimental quadrupolar splittings ( $\Delta\nu_{\text{Q}}$ ) after spectra simulations  
569 according to equation 1 :

$$570 \quad 1 \quad \Delta\nu_{\text{Q}}\theta = 32A_{\text{Q}}3\cos 2\theta - 12SCD$$

571 in which  $A_{\text{Q}}$ , the quadrupolar coupling constant for methyl moieties is 167 kHz,  
572 and  $\theta$  is the angle between the magnetic field and the bilayer normal.

### 573 **Western blotting**

574 Samples for Western blotting were prepared by collecting 1 OD $_{600\text{nm}}$  of mid-  
575 logarithmic phase cells, adding glass beads and flash freezing in liquid  
576 nitrogen<sup>37</sup>. Samples were vigorously agitated in 60  $\mu\text{L}$  SDS sample buffer  
577 supplemented with 1 mM fresh PMSF. Samples were immediately boiled and  
578 analyzed by SDS-PAGE, Western blotting and probed with appropriate  
579 antibodies.

## 580 **Imaging**

581 Cells were imaged using a wide-field inverted microscope (Zeiss Axiovert  
582 200M) with a 100× objective (oil, numerical aperture [NA] 1.4, plan Apo), and  
583 an electron-multiplying charge-coupled device (EMCCD) camera (Evolve;  
584 Photometrics, Tuscon, AZ). MetaMorph 7.7 software (Molecular Devices,  
585 Sunnyvale, CA) was used for image acquisition and analysis. Filter sets  
586 LF488-B-000 (FFO2- 482/18, FFO1-525/45, Di01-R488 [exciter, emitter,  
587 dichroic]) and LF561-A-000 (FFO2-561/14, FFO1-609/54, Di01-R561) were  
588 used to sequentially image cells expressing Bem1-GFP and Cdc24-mCherry  
589 <sup>67</sup>.

## 590 **Image analysis**

591 Deconvolution was performed for visualization, where indicated, using a plug-  
592 in running within Metamorph software <sup>68</sup>. All Images were analyzed and  
593 processed using ImageJ software on raw data, not on deconvolved images.

594 To calculate the enrichment of PI4P at the plasma membrane, the integrated  
595 intensity (II) and area (A) of the entire cell (E) and the cytosol (C) were  
596 determined for each cell after background subtraction. Next, the mean gray  
597 value of the plasma membrane (MGVP) for each cell was determined as  
598 follows:  $MGVP = (IIE-IIC)/(AE-AC)$ . The values were plotted using GraphPad  
599 Prism software.

600 To calculate the enrichment of Bem1 at the pole, the mean gray value of the  
601 pole (MGVP) and the cell (MGVC) were determined for each cell using an  
602 empirically determined threshold value that enabled the cell pole to be

603 identified. Next, the MGVP was normalised as follows: normalised mean gray  
604 value of the pole =  $(MGVP-MGVC)/MGVC$ . The values were plotted using  
605 GraphPad Prism software.

#### 606 **Cdc24 GEF assay**

607 Förster resonance energy transfer (FRET) between Cdc42 and N-  
608 methylantraniloyl-GTP (mant-GTP) was measured to monitor the Cdc24-  
609 mediated GDP to mant-GTP exchange reaction on Cdc42 in real time. Trp97  
610 of Cdc42, which is in close proximity to the GTP binding site, was excited  
611 using 280 nm wavelength light using a 5 nm bandwidth. The FRET signal was  
612 detected at the emission peak of mant-GTP, at 440 nm using an 8 nm  
613 bandwidth. All fluorescence measurements were performed at 27°C on a  
614 Tecan Infinite M1000PRO plate reader (Tecan Group, Männedorf, Germany)  
615 in 384-well, non-binding microplates (Greiner Bio-One, Courtaboeuf, France),  
616 in a 10 µl reaction volume. The final buffer conditions were 20 mM Tris-HCl  
617 (pH = 8.0), 150 mM NaCl, 1 mM DTT, 5 mM MgCl<sub>2</sub>, 100 nM mant-GTP,  
618 supplemented with 100 µM GMP-PNP nucleotide. Cdc24 was used at a final  
619 concentration of 60 nM after 30 min room temperature pre-incubation with  
620 Bem1 at 5 µM. The reaction was initiated by adding Cdc42 to 9 µM final  
621 concentration and exchange was monitored for at least 2000 s with 15 s  
622 intervals. For each sample, a mock reaction was used in the absence of GDP-  
623 loaded Cdc42 to normalise for bleaching and to subtract possible sources of  
624 background noise such as Cdc24-mant-GTP interaction. The intrinsic GDP to  
625 mant-GTP exchange rate of Cdc42 was determined in the absence of Cdc24.

626 Fitting of the kinetic trace data was performed in GraphPad Prism using a  
627 single exponential equation and the observed kinetic rate constants were  
628 compared.

$$629 \quad I = I_{\text{Max}} + (I_{\text{Max}} - I_{\text{Min}})(1 - e^{-k_{\text{obs}}t}),$$

630 where I is the fluorescence intensity change, I<sub>Max</sub> is the maximal  
631 fluorescence intensity, I<sub>Min</sub> is the minimal fluorescence intensity, k<sub>obs</sub> is the  
632 observed kinetic rate constant and t is the time in seconds.

### 633 **Cdc24 affinity for anionic lipids in the presence of Bem1**

634 The affinity of Cdc24 for anionic lipids in the presence of Bem1 was estimated  
635 using nonlinear regression analysis<sup>69</sup>. In the analysis, we assume an  
636 approximate initial K<sub>d</sub> between Cdc24 and anionic lipids of 1 μM<sup>14</sup>. A  
637 nonlinear regression fit with equation 2 was used to obtain the corresponding  
638 K<sub>d</sub> for the Cdc24 interaction with anionic lipids in the presence of Bem1:

$$639 \quad (2) \quad Y = N_u + (N_b - N_u) \cdot \frac{\{x + (P) + K_d\} - [\{x + (P) + K_d\}^2 - (4 \cdot x \cdot (P))]^{0.5}}{2 \cdot (P)}$$

640 where Y is the percentage of Cdc24 found in the supernatant at the lipid  
641 concentration P. P was chosen based on the following: first, around 30% of  
642 Cdc24 interacted with anionic liposomes (see Figure 5B). Second, the PH  
643 domain is assumed to interact with 3-5 lipid molecules<sup>70</sup>. In the floatation  
644 experiments involving Bem1 and Cdc24 shown in Figure 5B, C and D, 1 μM of  
645 Cdc24 was used, so P = [Cdc24] \* (30%) \* 3 lipid molecules = 0.9 μM lipids that  
646 are estimated to interact with Cdc24. In the equation, N<sub>u</sub> and N<sub>b</sub> are the  
647 maximum unbound and bound percentage of Cdc24, respectively, and x is the  
648 Bem1 concentration.

649 **Single Particle Tracking Photoactivation Localization Microscopy**  
650 **(sptPALM)**

651 Live cells were imaged using a widefield, inverted microscope (Axiovert 200M;  
652 Carl Zeiss, Marly le Roi, France) equipped with a 100X TIRFM objective (oil,  
653 NA 1.46, plan Apo), iLas<sup>2</sup> TIRF system (Roper Scientific) and an EMCCD  
654 camera (Evolve; Photometrics, Tuscon, Arizona). The imaging system was  
655 maintained at a constant temperature of 25°C using a custom designed  
656 incubator (Box and Cube, Life Imaging System, Basel, Switzerland).  
657 MetaMorph 7.7 software (Molecular Devices, Sunnyvale, USA) was used for  
658 image acquisition and analysis.

659 For *in vivo* imaging, cells expressing mEOS-Cdc42 were grown to mid-  
660 log phase and imaged at 25°C. Coverslips (High precision 18 x 18 mm, 1.5 H,  
661 Marienfeld, Lauda-Königshofen, Germany) were washed overnight in a  
662 solution of 1M HCl and 1M HNO<sub>3</sub> then rinsed three times the next day in  
663 ultrapure water. After a 30-minute incubation in water, then 30 minutes in  
664 ethanol, the coverslips were dried and used for imaging. Imaging was  
665 performed in a highly oblique illumination (HiLo) mode. mEOS-Cdc42 cells  
666 were imaged using a 561 nm laser with additional continuous  
667 photoconversion using a 405 nm laser. The 405 nm laser was maintained at  
668 low power (0.3-1 µW) for adequate separation of stochastically converted  
669 molecules. The iLas<sup>2</sup> system was used in arc mode for live imaging and  
670 ellipse mode for fixed samples. These settings set the pattern of rotation of  
671 the lasers on the back focal plane of the TIRF objective. The fluorescence  
672 was collected on the EMCCD camera after passing through a combination of  
673 dichroic and emission filters (D101-R561 and F39-617 respectively; Chroma,

674 Bellows Falls, VT). Images were acquired in streaming mode at 50 Hz (20 ms  
675 exposure time). During *in vivo* imaging, 16,000 to 20,000 images were  
676 collected for each cell. Multicolour fluorescent 100 nm beads (Tetraspeck,  
677 Invitrogen) were used as fiduciary markers in all super-resolution imaging  
678 experiments to register long-term acquisitions for lateral drift correction.

679 For fixed-cell imaging, cells were grown to log phase ( $OD_{600\text{ nm}}$  of  $<0.8$ )  
680 and fixed with 3.7% formaldehyde and 0.2% glutaraldehyde for 10 minutes.  
681 After washing in PBS three times, cells were resuspended in PBS and directly  
682 used for imaging. Image acquisition of fixed cells was performed using the  
683 same protocol as for living cells, as described above. 32,000 to 40,000  
684 images were acquired per cell, at which point the pool of photoconvertible  
685 single molecules was completely depleted.

686

### 687 **Single particle localization, tracking and nanocluster detection by** 688 **Voronoi Tessellation**

689 Image stacks collected for each sptPALM experiment were analyzed using a  
690 custom-written software operating as a plugin within MetaMorph software,  
691 PalmTracer, to compute single molecule localizations and dynamics. Diffusion  
692 coefficients obtained for each strain are listed in Table 1. Single molecules  
693 were localized in each image frame and tracked over time using wavelet  
694 segmentation and simulated annealing algorithms<sup>22</sup>. The sptPALM image  
695 resolution, defined as  $FWHM = 2.3 \times$  the pointing accuracy, was estimated to  
696 48 nm. The pointing accuracy, measured to be 20.86 nm, was computed from  
697 the acquisition of mEOS-Cdc42 in fixed cells by bidimensional Gaussian fitting

698 of the spatial distribution of 80 single molecules localized for more than 20  
699 consecutive time points. Tracking data and subsequent MSDs were  
700 generated from the membrane-bound population of mEOS-Cdc42. Proteins in  
701 the freely diffusing cytosolic pool of mEOS-Cdc42 were not tracked in these  
702 experiments because cytosolic diffusion is much higher than diffusion in a  
703 membrane environment, and would not be localized and tracked with 20 ms  
704 exposure time.

705 In our observations, all MSDs have a quasi-linear dependence at short  
706 times, enabling computation of the instantaneous diffusion coefficient ( $D$ ) per  
707 molecule by linear regression on the first four points of the MSD of all  
708 trajectories that are longer than 6 consecutive frames.

709 Cdc42 nanoclusters were quantified from the reconstructed super-  
710 resolution images of fixed cells using SR-Tesseler analysis<sup>22</sup>. This software is  
711 based on Voronoï tessellation, wherein single molecule localizations are  
712 treated as seeds around which polygons are assembled. In our analysis, we  
713 defined regions of interest (ROI) as the pole or non-pole of the cell after visual  
714 inspection of the widefield 491 nm image acquired at the outset of the  
715 experiment. The surface area of the polygon drawn around the detected  
716 single molecule is proportional to the local molecular density, such that the  
717 area of the polygon decreases as the local density of single molecule  
718 localizations increases. PALM images were corrected for single-molecule  
719 blinking within the SR-Tesseler software<sup>22</sup>. This takes into account mEOS  
720 photophysics, and a pointing accuracy of 20 nm as a radius of search, which  
721 would otherwise overestimate the number of single molecule detections. After  
722 blinking correction, nanoclusters were defined as those areas containing a



723 minimum of five localizations at a local density that was at least two-fold  
724 higher than the average density within the selected ROI. Nanocluster  
725 characteristics including diameter, area and the number of localizations were  
726 exported from SR-Tesseler into Excel (Microsoft) for further statistical  
727 analysis.

## 728 **Statistical Analysis**

729 The diffusion coefficients were represented as box plots displaying the  
730 median as a line and the percentiles (25–75%). Statistical comparisons were  
731 made using a non-parametric, two-tailed Mann–Whitney rank sum test. Non-  
732 Gaussian distributions of nanocluster sizes were represented by data-points  
733 displaying median as a line and the percentiles (25–75%) and also compared  
734 using a non-parametric, two-tailed Mann–Whitney rank sum test. Statistical  
735 analyses were based on cluster area values calculated by SR-Tesseler. Only  
736 areas greater than 2000 nm<sup>2</sup> were used, corresponding to a diameter of 48  
737 nm, the resolution of our imaging system.

## 738 **Acknowledgements**

739 We thank Cameron Mackereth for advice on nonlinear regression analysis  
740 and fitting methods. We also thank Bertrand Daignan-Fornier for anti-Ade13  
741 antibody, Helle Ulrich and Douglas Koshland for AID/TIR plasmids and Nelly  
742 Savarit, Melanie Sevrin and Laure Bataille for performing preliminary liposome  
743 floatation experiments. Anne Royou and Andrew Weatherall are  
744 acknowledged for their continued support. We thank Jean-Louis Mergny for  
745 the use of his fluorescence plate reader. This work received funding from the  
746 University of Bordeaux through the Synthetic Biology in Bordeaux (SB2)

747 Program and a Doctoral School Fellowship to JM. This work was also funded  
748 by the CNRS, ANR through Program Blanc grant ANR-13-BSV2-0015-01 and  
749 ANR-14-CE09-0020-01, the Regional Council of Aquitaine, the European  
750 Research Council (ERC-2015-StG GA no. 639020 to A.L.) and the IdEx  
751 Bordeaux (Chaire d'Installation to B.H., ANR-10-IDEX-03-02).

## 752 **Author contributions**

753 DMcC conceived the study. All authors designed experiments and analyzed  
754 the data. JM and AML performed the experiments, with the exception of NMR  
755 spectroscopy, which was performed by DM and analyzed by AL and BH.  
756 DMcC wrote the manuscript.

## 757 **Competing interests**

758 The authors declare no competing interests.

## 759 **References**

- 760 1. Drubin, D.G. & Nelson, W.J. Origins of cell polarity. *Cell* **84**, 335-344  
761 (1996).
- 762 2. Atwood, S.X., Chabu, C., Penkert, R.R., Doe, C.Q. & Prehoda, K.E.  
763 Cdc42 acts downstream of Bazooka to regulate neuroblast polarity  
764 through Par-6 aPKC. *J Cell Sci* **120**, 3200-3206 (2007).
- 765 3. Gotta, M., Abraham, M.C. & Ahringer, J. CDC-42 controls early cell  
766 polarity and spindle orientation in *C. elegans*. *Curr Biol* **11**, 482-488  
767 (2001).

- 768 4. Johnson, D.I. & Pringle, J.R. Molecular characterization of CDC42, a  
769 *Saccharomyces cerevisiae* gene involved in the development of cell  
770 polarity. *J Cell Biol* **111**, 143-152 (1990).
- 771 5. Kay, A.J. & Hunter, C.P. CDC-42 regulates PAR protein localization  
772 and function to control cellular and embryonic polarity in *C. elegans*.  
773 *Curr Biol* **11**, 474-481 (2001).
- 774 6. Stowers, L., Yelon, D., Berg, L.J. & Chant, J. Regulation of the  
775 polarization of T cells toward antigen-presenting cells by Ras-related  
776 GTPase CDC42. *Proc Natl Acad Sci U S A* **92**, 5027-5031 (1995).
- 777 7. Ghomashchi, F., Zhang, X., Liu, L. & Gelb, M.H. Binding of prenylated  
778 and polybasic peptides to membranes: affinities and intervesicle  
779 exchange. *Biochemistry* **34**, 11910-11918 (1995).
- 780 8. Finegold, A.A. *et al.* Protein geranylgeranyl transferase of  
781 *Saccharomyces cerevisiae* is specific for Cys-Xaa-Xaa-Leu motif  
782 proteins and requires the *CDC43* gene product but not the *DPR1* gene  
783 product. *Proc. Natl. Acad. Sci. USA* **88**, 4448-4452 (1991).
- 784 9. Kozminski, K.G., Chen, A.J., Rodal, A.A. & Drubin, D.G. Functions and  
785 functional domains of the GTPase Cdc42p. *Mol Biol Cell* **11**, 339-354  
786 (2000).
- 787 10. Richman, T.J., Sawyer, M.M. & Johnson, D.I. *Saccharomyces*  
788 *cerevisiae* Cdc42p localizes to cellular membranes and clusters at sites  
789 of polarized growth. *Eukaryot Cell* **1**, 458-468 (2002).
- 790 11. Richman, T.J. *et al.* Analysis of cell-cycle specific localization of the  
791 Rdi1p RhoGDI and the structural determinants required for Cdc42p

- 792 membrane localization and clustering at sites of polarized growth. *Curr*  
793 *Genet* **45**, 339-349 (2004).
- 794 12. Butty, A.C. *et al.* A positive feedback loop stabilizes the guanine-  
795 nucleotide exchange factor Cdc24 at sites of polarization. *Embo J* **21**,  
796 1565-1576 (2002).
- 797 13. Toenjes, K.A., Simpson, D. & Johnson, D.I. Separate membrane  
798 targeting and anchoring domains function in the localization of the *S.*  
799 *cerevisiae* Cdc24p guanine nucleotide exchange factor. *Curr Genet* **45**,  
800 257-264 (2004).
- 801 14. Yu, J.W. *et al.* Genome-wide analysis of membrane targeting by *S.*  
802 *cerevisiae* pleckstrin homology domains. *Mol Cell* **13**, 677-688 (2004).
- 803 15. Stahelin, R.V., Karathanassis, D., Murray, D., Williams, R.L. & Cho, W.  
804 Structural and membrane binding analysis of the Phox homology  
805 domain of Bem1p: basis of phosphatidylinositol 4-phosphate specificity.  
806 *J Biol Chem* **282**, 25737-25747 (2007).
- 807 16. Yu, J.W. & Lemmon, M.A. All phox homology (PX) domains from  
808 *Saccharomyces cerevisiae* specifically recognize phosphatidylinositol  
809 3-phosphate. *J Biol Chem* **276**, 44179-44184 (2001).
- 810 17. Irazoqui, J.E., Gladfelter, A.S. & Lew, D.J. Scaffold-mediated symmetry  
811 breaking by Cdc42p. *Nat Cell Biol* **5**, 1062-1070 (2003).
- 812 18. Haupt, A. & Minc, N. Gradients of phosphatidylserine contribute to  
813 plasma membrane charge localization and cell polarity in fission yeast.  
814 *Mol Biol Cell* **28**, 210-220 (2017).
- 815 19. Yeung, T. *et al.* Membrane phosphatidylserine regulates surface  
816 charge and protein localization. *Science* **319**, 210-213 (2008).

- 817 20. Das, A. *et al.* Flippase-mediated phospholipid asymmetry promotes  
818 fast Cdc42 recycling in dynamic maintenance of cell polarity. *Nat Cell*  
819 *Biol* **14**, 304-310 (2012).
- 820 21. Fairn, G.D., Hermansson, M., Somerharju, P. & Grinstein, S.  
821 Phosphatidylserine is polarized and required for proper Cdc42  
822 localization and for development of cell polarity. *Nat Cell Biol* **13**, 1424-  
823 1430 (2011).
- 824 22. Sartorel, E. *et al.* Phosphatidylserine and GTPase activation control  
825 Cdc42 nanoclustering to counter dissipative diffusion. (In Press).
- 826 23. Raghupathy, R. *et al.* Transbilayer lipid interactions mediate  
827 nanoclustering of lipid-anchored proteins. *Cell* **161**, 581-594 (2015).
- 828 24. Zhou, Y. *et al.* Lipid-Sorting Specificity Encoded in K-Ras Membrane  
829 Anchor Regulates Signal Output. *Cell* **168**, 239-251 e216 (2017).
- 830 25. Zhou, Y. *et al.* SIGNAL TRANSDUCTION. Membrane potential  
831 modulates plasma membrane phospholipid dynamics and K-Ras  
832 signaling. *Science* **349**, 873-876 (2015).
- 833 26. Moser von Filseck, J. *et al.* INTRACELLULAR TRANSPORT.  
834 Phosphatidylserine transport by ORP/Osh proteins is driven by  
835 phosphatidylinositol 4-phosphate. *Science* **349**, 432-436 (2015).
- 836 27. Chung, J. *et al.* INTRACELLULAR TRANSPORT.  
837 PI4P/phosphatidylserine countertransport at ORP5- and ORP8-  
838 mediated ER-plasma membrane contacts. *Science* **349**, 428-432  
839 (2015).
- 840 28. Morawska, M. & Ulrich, H.D. An expanded tool kit for the auxin-  
841 inducible degron system in budding yeast. *Yeast* **30**, 341-351 (2013).

- 842 29. Nishimura, K., Fukagawa, T., Takisawa, H., Kakimoto, T. & Kanemaki,  
843 M. An auxin-based degron system for the rapid depletion of proteins in  
844 nonplant cells. *Nat Methods* **6**, 917-922 (2009).
- 845 30. Ito, T., Matsui, Y., Ago, T., Ota, K. & Sumimoto, H. Novel modular  
846 domain PB1 recognizes PC motif to mediate functional protein-protein  
847 interactions. *Embo J* **20**, 3938-3946 (2001).
- 848 31. Rapali, P. *et al.* Scaffold-mediated gating of Cdc42 signalling flux. *eLife*  
849 **6** (2017).
- 850 32. Yamaguchi, Y., Ota, K. & Ito, T. A novel Cdc42-interacting domain of  
851 the yeast polarity establishment protein Bem1. Implications for  
852 modulation of mating pheromone signaling. *J Biol Chem* **282**, 29-38  
853 (2007).
- 854 33. Bender, A. & Pringle, J.R. Use of a screen for synthetic lethal and  
855 multicopy suppressor mutants to identify two new genes involved in  
856 morphogenesis in *Saccharomyces cerevisiae*. *Mol Cell Biol* **11**, 1295-  
857 1305 (1991).
- 858 34. Chant, J., Corrado, K., Pringle, J.R. & Herskowitz, I. Yeast BUD5,  
859 encoding a putative GDP-GTP exchange factor, is necessary for bud  
860 site selection and interacts with bud formation gene BEM1. *Cell* **65**,  
861 1213-1224 (1991).
- 862 35. Hokanson, D.E., Laakso, J.M., Lin, T., Sept, D. & Ostap, E.M. Myo1c  
863 binds phosphoinositides through a putative pleckstrin homology  
864 domain. *Mol Biol Cell* **17**, 4856-4865 (2006).

- 865 36. Gulli, M.P. *et al.* Phosphorylation of the Cdc42 exchange factor Cdc24  
866 by the PAK-like kinase Cla4 may regulate polarized growth in yeast.  
867 *Mol Cell* **6**, 1155-1167 (2000).
- 868 37. McCusker, D. *et al.* Cdk1 coordinates cell-surface growth with the cell  
869 cycle. *Nat Cell Biol* **9**, 506-515 (2007).
- 870 38. Slaughter, B.D. *et al.* Non-uniform membrane diffusion enables steady-  
871 state cell polarization via vesicular trafficking. *Nat Commun* **4**, 1380  
872 (2013).
- 873 39. Snaith, H.A. & Sawin, K.E. Fission yeast mod5p regulates polarized  
874 growth through anchoring of tea1p at cell tips. *Nature* **423**, 647-651  
875 (2003).
- 876 40. Srinivasan, S. *et al.* Rac and Cdc42 play distinct roles in regulating  
877 PI(3,4,5)P3 and polarity during neutrophil chemotaxis. *J Cell Biol* **160**,  
878 375-385 (2003).
- 879 41. Wedlich-Soldner, R., Wai, S.C., Schmidt, T. & Li, R. Robust cell polarity  
880 is a dynamic state established by coupling transport and GTPase  
881 signaling. *J Cell Biol* **166**, 889-900 (2004).
- 882 42. Weiner, O.D. *et al.* A PtdInsP(3)- and Rho GTPase-mediated positive  
883 feedback loop regulates neutrophil polarity. *Nat Cell Biol* **4**, 509-513  
884 (2002).
- 885 43. Fletcher, G.C., Lucas, E.P., Brain, R., Tournier, A. & Thompson, B.J.  
886 Positive feedback and mutual antagonism combine to polarize Crumbs  
887 in the *Drosophila* follicle cell epithelium. *Curr Biol* **22**, 1116-1122  
888 (2012).

- 889 44. Bose, I. *et al.* Assembly of scaffold-mediated complexes containing  
890 Cdc42p, the exchange factor Cdc24p, and the effector Cla4p required  
891 for cell cycle-regulated phosphorylation of Cdc24p. *J Biol Chem* **276**,  
892 7176-7186 (2001).
- 893 45. Goryachev, A.B. & Pokhilko, A.V. Dynamics of Cdc42 network  
894 embodies a Turing-type mechanism of yeast cell polarity. *FEBS Lett*  
895 **582**, 1437-1443 (2008).
- 896 46. Witte, K., Strickland, D. & Glotzer, M. Cell cycle entry triggers a switch  
897 between two modes of Cdc42 activation during yeast polarization. *eLife*  
898 **6** (2017).
- 899 47. Das, S. *et al.* Single-molecule tracking of small GTPase Rac1 uncovers  
900 spatial regulation of membrane translocation and mechanism for  
901 polarized signaling. *Proc Natl Acad Sci U S A* **112**, E267-276 (2015).
- 902 48. Murakoshi, H. *et al.* Single-molecule imaging analysis of Ras activation  
903 in living cells. *Proc Natl Acad Sci U S A* **101**, 7317-7322 (2004).
- 904 49. Nan, X. *et al.* Ras-GTP dimers activate the Mitogen-Activated Protein  
905 Kinase (MAPK) pathway. *Proc Natl Acad Sci U S A* **112**, 7996-8001  
906 (2015).
- 907 50. Remorino, A. *et al.* Gradients of Rac1 Nanoclusters Support Spatial  
908 Patterns of Rac1 Signaling. *Cell reports* **21**, 1922-1935 (2017).
- 909 51. Tian, T. *et al.* Plasma membrane nanoswitches generate high-fidelity  
910 Ras signal transduction. *Nat Cell Biol* **9**, 905-914 (2007).
- 911 52. Gronnier, J. *et al.* Structural basis for plant plasma membrane protein  
912 dynamics and organization into functional nanodomains. *eLife* **6**  
913 (2017).



- 914 53. Kelly, R.C., Jensen, D.E. & von Hippel, P.H. DNA "melting" proteins.  
915 IV. Fluorescence measurements of binding parameters for  
916 bacteriophage T4 gene 32-protein to mono-, oligo-, and  
917 polynucleotides. *J Biol Chem* **251**, 7240-7250 (1976).
- 918 54. Papayannopoulos, V. *et al.* A polybasic motif allows N-WASP to act as  
919 a sensor of PIP(2) density. *Mol Cell* **17**, 181-191 (2005).
- 920 55. Bailey, M.J. & Prehoda, K.E. Establishment of Par-Polarized Cortical  
921 Domains via Phosphoregulated Membrane Motifs. *Dev Cell* **35**, 199-  
922 210 (2015).
- 923 56. Hayakawa, A. *et al.* Structural basis for endosomal targeting by FYVE  
924 domains. *J Biol Chem* **279**, 5958-5966 (2004).
- 925 57. Lemmon, M.A. & Ferguson, K.M. Signal-dependent membrane  
926 targeting by pleckstrin homology (PH) domains. *Biochem J* **350 Pt 1**, 1-  
927 18 (2000).
- 928 58. Seaman, M.N. & Williams, H.P. Identification of the functional domains  
929 of yeast sorting nexins Vps5p and Vps17p. *Mol Biol Cell* **13**, 2826-2840  
930 (2002).
- 931 59. Buchkovich, N.J., Henne, W.M., Tang, S. & Emr, S.D. Essential N-  
932 terminal insertion motif anchors the ESCRT-III filament during MVB  
933 vesicle formation. *Dev Cell* **27**, 201-214 (2013).
- 934 60. Bender, L. *et al.* Associations among PH and SH3 domain-containing  
935 proteins and Rho-type GTPases in Yeast. *J Cell Biol* **133**, 879-894  
936 (1996).

- 937 61. Peterson, J. *et al.* Interactions between the bud emergence proteins  
938 Bem1p and Bem2p and Rho-type GTPases in yeast. *Journal of Cell*  
939 *Biology* **127**, 1395-1406 (1994).
- 940 62. Janke, C. *et al.* A versatile toolbox for PCR-based tagging of yeast  
941 genes: new fluorescent proteins, more markers and promoter  
942 substitution cassettes. *Yeast* **21**, 947-962 (2004).
- 943 63. Longtine, M.S. *et al.* Additional modules for versatile and economical  
944 PCR-based gene deletion and modification in *Saccharomyces*  
945 *cerevisiae*. *Yeast* **14**, 953-961 (1998).
- 946 64. Atkinson, K., Fogel, S. & Henry, S.A. Yeast mutant defective in  
947 phosphatidylserine synthesis. *J Biol Chem* **255**, 6653-6661 (1980).
- 948 65. Sherman, F., Fink, G. & Lawrence, C. *Methods in Yeast Genetics*.  
949 (Cold Spring Harbor Laboratory Press, Cold Spring Harbor, New York;  
950 1974).
- 951 66. Schagger, H. Tricine-SDS-PAGE. *Nature protocols* **1**, 16-22 (2006).
- 952 67. Jose, M., Tollis, S., Nair, D., Sibarita, J.B. & McCusker, D. Robust  
953 polarity establishment occurs via an endocytosis-based cortical  
954 corralling mechanism. *J Cell Biol* **200**, 407-418 (2013).
- 955 68. Jose, M. *et al.* A quantitative imaging-based screen reveals the exocyst  
956 as a network hub connecting endo- and exocytosis. *Mol Biol Cell*  
957 (2015).
- 958 69. Amezcua, C.A., Harper, S.M., Rutter, J. & Gardner, K.H. Structure and  
959 interactions of PAS kinase N-terminal PAS domain: model for  
960 intramolecular kinase regulation. *Structure* **10**, 1349-1361 (2002).

- 961 70. Ni, T. *et al.* Structure and lipid-binding properties of the kindlin-3  
962 pleckstrin homology domain. *Biochem J* **474**, 539-556 (2017).  
963  
964

964 **Figure legends**

965 **Fig. 1. PI4P and PS are essential for the anisotropic plasma membrane**  
966 **targeting of the Cdc42 GEF-scaffold complex *in vivo*.**

967 **a**, Representative images of Bem1-GFP and the PS marker LactC2-GFP  
968 (cyan) in wild type and *cho1* $\Delta$  cells. Merged DIC-fluorescence images are also  
969 shown. Images show average intensity projections of deconvolved z-stacks.  
970 Scale bars, 2  $\mu$ m in all images. **b**, Frequency of cells displaying polarized  
971 Bem1-GFP signal in wild type and *cho1* $\Delta$  cells ( $n > 100$  cells counted in each of  
972 3 independent experiments). Bars represent mean and SD. Student t-tests  
973 were performed where confidence is  $**p < 0.01$ ). **b**, Imaging of the PI4P probe  
974 GFP-2xPH<sup>Osh2</sup> in wild type and *cho1* $\Delta$  cells. Images show average intensity  
975 projections of deconvolved z-stacks. **d**, Scatter dot plot showing PI4P levels at  
976 the plasma membrane (see experimental procedure for details of the  
977 quantification) in wild type and *cho1* $\Delta$  cells ( $n =$  around 100 cells observed  
978 over 3 experiments). Bars represent mean and SD. Mann-Whitney tests were  
979 performed where confidence is  $****p < 0.0001$ ). **e**, Images of Bem1-GFP (cyan)  
980 in *cho1* $\Delta$  *9xMyc-AID-stt4* cells after 30 min treatment with or without 0.5 mM  
981 auxin. Merged DIC-fluorescence images are also shown. Images are average  
982 intensity projections of deconvolved z-stacks. **f**, Frequency of cells with  
983 polarized Bem1-GFP signal or Bem1-GFP in puncta in *cho1* $\Delta$  *9xMyc-AID-stt4*  
984 cells treated with or without auxin as shown in E ( $n > 100$  cells counted in each  
985 of 6 independent experiments). Bars represent mean and SD. Student t-tests  
986 were performed where confidence is  $***p < 0.001$  and  $****p < 0.0001$ ). **g**, Images  
987 of Bem1-GFP (cyan) and Cdc24-mCherry (red) signals in *cho1* $\Delta$  *9xMyc-AID-*  
988 *stt4* cells with or without auxin as shown in E. Merged DIC-fluorescence

989 images are also shown. Images show maximum intensity projections of z-  
990 stacks. **h**, Graphs showing the line-scans (yellow dashed line in G) of Bem1-  
991 GFP and Cdc24-mCherry signals. The top and bottom graphs correspond to  
992 the top and bottom images in G, respectively. The line-scan reveals the  
993 colocalization of Bem1 and Cdc24 at the pole in a non-treated cell and in the  
994 puncta in cells treated with auxin.

995 **Fig. 2. Identification of an anionic lipid targeting sequence in Bem1 and**  
996 **its effect on the ordering of lipid acyl chains.**

997 **a**, Schematic of the liposome floatation assay. In the assay, liposomes of  
998 defined lipid composition were floated through a dense sucrose gradient by  
999 ultracentrifugation. Protein that associates with the liposomes become  
1000 enriched in the supernatant. **b**, Upper panel. SDS-PAGE stained with  
1001 Coomassie blue in which Bem1 is indicated. Lower panel. The liposomes  
1002 were composed of 100% phosphatidylcholine (PC), 80% PC and 20%  
1003 phosphatidylethanolamine (PE), 95% PC and 5% phosphatidic acid (PA),  
1004 95% PC and 5% phosphatidylinositol (PI), 95% PC and 5% PI(4,5)P2  
1005 (PI(4,5)P2), 95% PC and 5% PI4P (PI4P), 80% PC and 20%  
1006 phosphatidylserine (PS) or 75% PC 20% PS 5% PI4P (PS+PI4P). (S)  
1007 supernatant, (P) pellet, Lower panel displays the percentage of Bem1  
1008 associated with liposomes containing the indicated lipids from 3 independent  
1009 experiments. Error bars display SD. Student t-tests were performed where  
1010 confidence is \*\*p<0.01, \*\*\*p<0.001 and \*\*\*\*p<0.0001. **c**, Scheme of full-length  
1011 Bem1 with its domains and the Bem1 deletion constructs used to identify the  
1012 anionic lipid interacting sequences. **d**, Percentage of the indicated bem1  
1013 constructs associated with liposomes containing 75% PC, 20% PS and 5%

1014 PI4P. Error bars show SD (n=3 experimental replicates). Student t-tests were  
1015 performed where confidence is \*\*\*p<0.001. **e**, Lipid ordering determined by <sup>2</sup>H  
1016 solid-state NMR analysis of liposomes containing PC-d54/PS/PI4P (15:4:1  
1017 molar ratio) in the presence or the absence of the Bem1 CLIC motifs.  
1018 Calculation of oriented-like spectra from Pake patterns (de-Pake-ing) and  
1019 simulation of <sup>2</sup>H solid-state NMR spectra were applied to measure individual  
1020 quadrupolar splittings for PC-d54 and determine order parameter accurately.

1021 **Fig. 3. The Bem1 CLIC sequence can act as a heterologous plasma**  
1022 **membrane targeting signal *in vivo*.**

1023 **a**, Schematic showing Bem1 domains with the lipid interacting motifs including  
1024 the cationic lipid interacting clusters (CLICs) and the PX domain. The Bem1  
1025 N-terminus contains 3 CLICs. The first cluster (CLIC-1) is composed of 6 K/R  
1026 residues, the second cluster (CLIC-2) of 3 K/R residues and the third cluster  
1027 (CLIC-3) of 5 K/R residues. The scheme shows the full-length bem1  
1028 constructs where none, one or all CLICs were mutated. **b**, Percentage of the  
1029 different full-length bem1 clic mutants associated with liposomes containing  
1030 75% PC 20% PS and 5% PI4P. Error bars display SD (n=3 experimental  
1031 replicates). Student t-tests were performed where confidence is \*\*p<0.01 and  
1032 \*\*\*\*p<0.0001. **c**, Fluorescence intensity change associated with the nucleotide  
1033 exchange of GDP-Cdc42 for mant-GTP Cdc42. Fluorescence was measured  
1034 after the addition of GDP-Cdc42 to reactions containing Mant-GTP (100 nM),  
1035 GMP-PNP (100 μM) and the proteins indicated. **d**, Ten-fold serial dilutions of  
1036 cells and subsequent colony formation on the indicated plates, where  
1037 expression of wild type *GALp-CDC42* is either induced in the presence of Gal  
1038 or repressed in Dex. Note how mutation of the wild type Cdc42 (KKSKK) to

1039 MMSMM is lethal (see blue box), whereas appending the Bem1 CLIC-1 motif  
1040 to this *cdc42* mutant restores viability (red box). **e**, Representative images of  
1041 the mEOS-*cdc42* mutants signal (cyan) after inducing the expression of  
1042 *GAL1p-CDC42* in the presence of Gal or repressing it in the presence of Dex.  
1043 The cells in the blue and red boxes correspond to the cells in the blue and red  
1044 box in panel **d**. Images are average fluorescence intensity projections.  
1045 Merged DIC-fluorescence images are also shown.

1046 **Fig. 4. The Bem1 CLIC sequence is required for Bem1 targeting to the**  
1047 **cell pole *in vivo*.**

1048 **a**, Ten-fold serial dilutions of the indicated mutant cells and subsequent  
1049 colony formation at the temperatures indicated. Note how mutations on both  
1050 the CLICs and PX in *bem1* compromise growth at the restrictive temperature.  
1051 **b**, Western blots probed with anti-HA antibody to detect the indicated *bem1*  
1052 constructs tagged with 3XHA (top panel). Detection of Ade13 was used as  
1053 loading control (bottom panel). **c**, Representative images of the indicated  
1054 *bem1*-GFP construct signals (cyan, top panels). The GFP images are average  
1055 intensity projections. GFP images were also merged with DIC (bottom  
1056 panels). **d**, Frequency of cells with polarized Bem1-GFP fluorescence ( $n > 100$   
1057 cells in each of at least 3 independent experiments). Bars display the mean  
1058 and SD. Student t-tests were performed where confidence is  $**p < 0.01$  and  
1059  $***p < 0.001$ ). **e**, Scatter dot plot showing the level of the indicated *bem1*-GFP  
1060 construct at the cell pole ( $n > 100$  cells observed over 3 experiments). Bars  
1061 indicate mean and SD. Mann-Whitney tests were performed where  
1062 confidence is  $***p < 0.001$  and  $****p < 0.0001$ ).

1063 **Fig. 5. Multivalent protein-lipid interactions drive avid targeting of the**  
1064 **Bem1-Cdc24 complex to anionic lipids.**

1065 **a**, Scheme of Bem1 and Cdc24 proteins indicating the relative position of the  
1066 mutations in the lipid tethering motifs (black x). **b**, Percentage of full-length  
1067 Cdc24 and *cdc24* ph domain mutant (*cdc24* ph) associated with liposomes  
1068 containing 75% PC 20% PS and 5% PI4P. Error bars display SD (n=3  
1069 experimental replicates). Student t-tests were performed where confidence is  
1070  $***p < 0.001$ . **c**, Percentage of Cdc24 and *cdc24* ph mutant associated with  
1071 liposomes of the composition shown in B in the presence of the indicated  
1072 *bem1* protein. Note how additive mutations in the Bem1 lipid binding  
1073 sequences reduce the percentage of Cdc24 associated with the liposomes. **d**,  
1074 Percentage of Cdc24 and *cdc24* ph associated with liposomes of the  
1075 composition shown in B as a function of the indicated *bem1* protein  
1076 concentration. The curves denote the regression fit of the data to equation 2  
1077 in the materials and methods. Error bars correspond to SD (n=3 experimental  
1078 replicates). Student t-tests were performed where confidence is  $***p < 0.001$   
1079 and  $****p < 0.0001$ . **e**, Ten-fold serial dilutions and subsequent colony  
1080 formation of the indicated mutant cells at the indicated temperatures. **f**, DIC  
1081 images of the indicated *bem1* and *cdc24* mutants showing the increased  
1082 morphological defects ensuing from loss of lipid tethering in the *bem1* and  
1083 *cdc24* mutants. **g**, Western blots probed with anti-HA antibody to detect  
1084 Cdc24 or *cdc24* ph tagged with 3XHA in the indicated mutant strains (top  
1085 panel). Detection of Ade13 was used as a loading control (bottom panel).

1086 **Fig. 6. The Bem1 CLIC motifs are required for reduced Cdc42 diffusion,**  
1087 **large nanoclusters and optimal Cdc42 activation at the cell pole.**



1088 **a**, Scheme of the *bem1* mutants used for imaging. **b**, Global average MSD  
1089 curves of mEOS-Cdc42 in the strains indicated at the Pole (P) and Non-Pole  
1090 (NP) of cells. Trajectories longer than 6 frames were analyzed. Number of  
1091 trajectories analyzed: *BEM1* (N=11 cells: NP: 1854 tracks; P: 706); *bem1 clic-*  
1092 *14E px* (N=10 cells: NP: 1793 tracks; P: 908); *bem1 clic-14E* (N=13 cells: NP:  
1093 1714 tracks; P: 975). **c**, D coefficients of mEOS-Cdc42 in the strains indicated  
1094 (in box-plots displaying the median (line), the 25-75 percentiles (box) and the  
1095 mean (cross)), which were compared using a non-parametric, two-tailed  
1096 Mann–Whitney rank sum test. The resulting P-values are indicated as follows:  
1097 ns,  $P > 0.05$ ; \* $P < 0.05$ ; \*\* $P < 0.01$ , \*\*\* $P < 0.001$ , \*\*\*\* $P < 0.0001$ . **d**, SR-Tesseler  
1098 images of mEOS-Cdc42 nanocluster organization in *BEM1* (5312 localizations  
1099 shown in image) and *bem1 clic-14E px* cells (3739 localizations shown).  
1100 Insets show mEOS-Cdc42 after 491 nm widefield laser excitation to identify  
1101 the cell pole. Scale bar: 2  $\mu\text{m}$ . A zoom of the pole region shows the  
1102 organization of the detected nanoclusters, circled in light blue, in the strains  
1103 indicated. Scale bar in the zoom: 60 nm. **e**, Distribution of nanocluster area at  
1104 the pole (P) and non-pole (NP) regions of *BEM1* (diameter NP: 59 nm  $\pm$  1 nm  
1105 (s.e.m); P: 74 nm  $\pm$  3,2 nm) (N=16 cells. NP: 570 clusters; P: 162 clusters)  
1106 and *bem1 clic14E px* cells (diameter NP: 59 nm  $\pm$  1,5 nm (s.e.m); P: 57 nm  $\pm$   
1107 2,4 nm) (N=15 cells. NP: 421 clusters; P: 141 clusters). Data are presented as  
1108 scatter dot-plots displaying the median as a line and the 25-75 percentiles.  
1109 Data were compared using non-parametric, two-tailed Mann–Whitney rank  
1110 sum test. **f**, Active Cdc42-GTP levels were quantified in the strains indicated  
1111 using a *gic2*<sub>(1-208)</sub>-yeGFP probe. Bars indicate mean and SD (n<30 cells

1112 observed over 2 experiments). Mann-Whitney tests were performed where  
1113 confidence is \*\*\*\* $p < 0.0001$ .

1114 **Fig. 7. Schematic illustrating the reciprocal relationship between Cdc42**  
1115 **regulators and the membrane environment.**

1116 1) The Bem1-Cdc24 complex is recruited to the plasma membrane via  
1117 multivalent interactions with anionic lipids. The CLIC motifs in Bem1 provide  
1118 the strongest affinity for anionic lipids at this step.

1119 2) Upon their recruitment to anionic lipids, the Bem1 CLIC motifs influence the  
1120 membrane environment by increasing acyl chain order and rigidifying the local  
1121 membrane environment.

1122 **Supplementary Fig. 1.**

1123 **a**, Scatter dot plot showing the level of Bem1-GFP signal at the cell pole. ( $n >$   
1124 100 cells observed from 3 experiments). Bars correspond to mean and SD.  
1125 Mann-Whitney tests were performed where confidence is \*\*\*\* $p < 0.0001$ ). **b**,  
1126 Ten-fold serial dilutions and subsequent colony formation of cells of the  
1127 indicated genotype. Cells were grown at 30°C for two days on YPD plates  
1128 with or without 0.5 mM auxin. **c**, Ten-fold serial dilutions and subsequent  
1129 colony formation of cells of the indicated genotype. Cells were grown at 30°C  
1130 for three days on SCD plates with or without 0.1 mM choline. **d**,  
1131 Representative images of a GFP-tagged PI4P probe signal (GFP-2xPH<sup>Osh2</sup>)  
1132 (cyan) in *cho1Δ*, *9xMyc-AID-stt4* cells after 2h treatment with or without 0.5  
1133 mM auxin. Merged DIC-fluorescence images are also shown. Images show  
1134 average intensity projections of deconvolved z-stacks. **e**, Scatter dot plot of

1135 PI4P levels in *cho1Δ 9xMyc-AID-stt4* cells after 2h treatment with or without  
1136 0.5 mM auxin (n>80 cells in 3 independent experiments). Bars correspond to  
1137 mean and SD. Mann-Whitney tests were performed where confidence is  
1138 \*\*\*\*p<0.0001. **f**, Western blots probed with anti-Myc antibody (top panel) to  
1139 detect AID-stt4, anti-GFP antibody (middle panel) to detect Bem1 or anti-  
1140 Ade13 antibody (bottom panel) as a loading control. Note that Bem1 levels in  
1141 *cho1Δ, 9xMyc-AID-stt4* cells treated with auxin for 2h remain similar to the  
1142 wild type.

1143 **Supplementary Fig. 2.**

1144 **a**, Upper panel. SDS-PAGE stained with Coomassie blue displaying BSA.  
1145 Lower panel. Quantification of the percentage of BSA associated with  
1146 liposomes containing the lipids indicated. Error bars display SD (n=3  
1147 experimental replicates). **b**, Observed kinetic rate constants of GEF loading of  
1148 mant-GTP Cdc42. Values were obtained by fitting trace data to a single  
1149 exponential equation. Error bars show SD. Values were compared using  
1150 Student t-tests. **c**, and **d**, Ten-fold serial dilutions of the cells indicated were  
1151 grown at the temperatures displayed for three days. **e**, Alignment of the  
1152 second  $\beta$  sheet in the PH domain of the proteins indicated. Note how a  
1153 conserved cationic residue is followed by a hydrophobic patch.

1154

1154 **Tables and their legends**

1155 **Supplementary table 1. Plasmid constructs.**

| Name   | Description                                                                                                                                       | Reference           |
|--------|---------------------------------------------------------------------------------------------------------------------------------------------------|---------------------|
| pDM256 | pGEX6P2 <i>GST-BEM1</i>                                                                                                                           | <sup>31</sup>       |
| pDM272 | pET21 <i>Cdc24-6xHis</i>                                                                                                                          | This study          |
| pDM469 | pET21 <i>cdc42ΔCAIL-10xHis</i>                                                                                                                    | This study          |
| pDM514 | pGEX6P2 <i>GST-bem1 PX-PB1 (285-551)</i>                                                                                                          | This study          |
| pDM516 | pGEX6P2 <i>GST-bem1ΔPB1 (1-412)</i>                                                                                                               | This study          |
| pDM548 | pGEX6P2 <i>GST-bem1 PX (266-413)</i>                                                                                                              | This study          |
| pDM577 | pGEX6P2 <i>GST-bem1 SH3-1 SH3-2 PX (73-413)</i>                                                                                                   | This study          |
| pDM585 | pMK38 <i>pKan-pCUP1-9xMyc-AID</i>                                                                                                                 | Helle Ulrich's lab  |
| pDM589 | <i>pTIR4::LEU2</i>                                                                                                                                | Doug Koshland's lab |
| pDM600 | pGEX6P2 <i>GST-bem1 clic-14A (K3A, K6A, K9A, R10A, K16A, R18A, K36A, K39A, R44A, K54A, R57A, K62A, R64A, K68A)</i>                                | This study          |
| pDM602 | pGEX6P2 <i>GST-bem1 clic-6A (K3A, K6A, K9A, R10A, K16A, R18A)</i>                                                                                 | This study          |
| pDM604 | pGEX6P2 <i>GST-bem1 clic-3A (K36A, K39A, R44A)</i>                                                                                                | This study          |
| pDM606 | pGEX6P2 <i>GST-bem1 clic-5A (K54A, R57A, K62A, R64A, K68A)</i>                                                                                    | This study          |
| pDM636 | pGEX6P2 <i>GST-bem1 clic-14A px (K3A, K6A, K9A, R10A, K16A, R18A, K36A, K39A, R44A, K54A, R57A, K62A, R64A, K68A, K338M, K348A, R349A, R369A)</i> | This study          |
| pDM890 | pGEX6P2 <i>GST-bem1 clic-14E (K3E, K6E, K9E, R10E, K16E, R18E, K36E, K39E, R44E, K54E, R57E, K62E, R64E, K68E)</i>                                | This study          |
| pDM683 | pET21 <i>cdc24 ph (K513A)</i>                                                                                                                     | This study          |
| pDM729 | pGEX6P2 <i>GST-bem1 CLICs (1-72)-GAGAGA-PX (266-413)</i>                                                                                          | This study          |
| pDM924 | <i>pet21a bem1 CLICs (1-72)</i>                                                                                                                   | This study          |
| pDM596 | pUC57 <i>bem1 clic-14A (K3A, K6A, K9A, R10A, K16A, R18A, K36A, K39A, R44A, K54A, R57A, K62A, R64A, K68A)</i>                                      | This study          |
| pDM597 | pUC57 <i>bem1 clic-6A (K3A, K6A, K9A, R10A, K16A, R18A)</i>                                                                                       | This study          |
| pDM598 | pUC57 <i>bem1 clic-3A (K36A, K39A, R44A)</i>                                                                                                      | This study          |
| pDM599 | pUC57 <i>bem1 clic-5A (K54A, R57A, K62A, R64A, K68A)</i>                                                                                          | This study          |
| pDM889 | pUC57 <i>bem1 clic-14E (K3E, K6E, K9E, R10E, K16E, R18E, K36E, K39E, R44E, K54E, R57E, K62E, R64E, K68E)</i>                                      | This study          |
| pDM655 | pRS315 <i>CDC42p-mEOS-4xGA-cdc42 MMSMK (K183M, K184M, K186M)</i>                                                                                  | This study          |
| pDM656 | pRS315 <i>CDC42p-mEOS-4xGA-cdc42 MMSMK (K183M, K184M, K186M, K187M)</i>                                                                           | This study          |
| pDM803 | pRS315 <i>CDC42p-mEOS-4xGA-cdc42 KSKK-bem1 CLIC1-CAIL</i>                                                                                         | This study          |
| pDM805 | pRS315 <i>CDC42p-mEOS-4xGA-cdc42 MMSMK-bem1 CLIC1-CAIL (K183M, K184M, K186M)</i>                                                                  | This study          |
| pDM807 | pRS315 <i>CDC42p-mEOS-4xGA-cdc42 MMSMM-bem1 CLIC1-CAIL (K183M, K184M, K186M, K187M)</i>                                                           | This study          |

|        |                                                                                                                                                   |                          |
|--------|---------------------------------------------------------------------------------------------------------------------------------------------------|--------------------------|
| pDM843 | pRS315 <i>CDC42p-mEOS-4xGA-cdc42 KSKM (K187M)</i>                                                                                                 | This study               |
| pDM865 | pRS306 <i>BEM1p-BEM1</i>                                                                                                                          | This study               |
| pDM906 | pRS306 <i>BEM1p-bem1 clic-14E (K3E, K6E, K9E, R10E, K16E, R18E, K36E, K39E, R44E, K54E, R57E, K62E, R64E, K68E)</i>                               | This study               |
| pDM947 | pRS306 <i>BEM1p-bem1 clic-14E px(K3E, K6E, K9E, R10E, K16E, R18E, K36E, K39E, R44E, K54E, R57E, K62E, R64E, K68E, K338M, K348A, R349A, R369A)</i> | This study               |
| pDM904 | pRS416 <i>CYC1p-CDC24-mCherry-6xHis-ADH1t</i>                                                                                                     | This study               |
| pDM032 | pDK51 <i>CDC24p-CDC24-3xHA:URA3</i>                                                                                                               | 37                       |
| pDM737 | pDK51 <i>CDC24p-cdc24K513A-3xHA:URA3</i>                                                                                                          | This study               |
| pDM659 | pRS416 <i>GFP-2xPH-plcδ</i>                                                                                                                       | This study* <sup>1</sup> |
| pDM489 | pRS416 <i>Lact-C2-GFP</i>                                                                                                                         | <sup>19</sup>            |
| pDM661 | pRS416 <i>GFP-2xPH-osh2</i>                                                                                                                       | This study* <sup>2</sup> |

1156 \*1 Derived from Addgene 36092 <sup>71</sup>. \*2 Derived from Addgene 36095 <sup>72</sup>.

1157 71. Stefan, C.J., Audhya, A. & Emr, S.D. The yeast synaptojanin-like  
 1158 proteins control the cellular distribution of phosphatidylinositol (4,5)-  
 1159 bisphosphate. *Mol Biol Cell* **13**, 542-557 (2002).

1160 72. Stefan, C.J. *et al.* Osh proteins regulate phosphoinositide metabolism  
 1161 at ER-plasma membrane contact sites. *Cell* **144**, 389-401 (2011).

1162

1163

1163 **Supplementary table 2. Yeast strains.**

| Name    | Genotype                                                                                                                          | Reference  |
|---------|-----------------------------------------------------------------------------------------------------------------------------------|------------|
| DMY2000 | BY4741; MATa, his3-1, leu2-0, met15-0, ura3-0, SSD1-V, bar1Δ::kanMX6, cdc42Δ::CaURA, pDM303 (pRS315 mEOS-CDC42).                  | This study |
| DMY2023 | BY4741; MATa, his3-1, leu2-0, met15-0, ura3-0, SSD1-V, bem1Δ::kanMX6, cdc42Δ::CaURA3, pDM303 (pRS315 mEOS-CDC42).                 | This study |
| DMY2105 | BY4741; MATa, his3-1, leu2-0, met15-0, ura3-0                                                                                     | This study |
| DMY2129 | BY4741; MATa, his3-1, leu2-0, met15-0, ura3-0, pGD1-osTIR-LEU2::leu2-0                                                            | This study |
| DMY2144 | BY4741; MATa, his3-1, leu2-0, met15-0, ura3-0, pGD1-osTIR-LEU2::leu2-0, pKan-pCUP1-9xMyc-AID-stt4                                 | This study |
| DMY2168 | BY4741; MATa, his3-1, leu2-0, met15-0, ura3-0, pGD1-osTIR-LEU2::leu2-0, pKan-pCUP1-9xMyc-AID-stt4, BEM1-GFP::HIS5                 | This study |
| DMY2176 | BY4741; MATa, his3-1, leu2-0, met15-0, ura3-0, BEM1-GFP::HIS5                                                                     | This study |
| DMY2179 | BY4741; MATa, his3-1, leu2-0, met15-0, ura3-0 bem1Δ::CaURA3                                                                       | This study |
| DMY2199 | BY4741; MATa, his3-1, leu2-0, met15-0, ura3-0, bem1 px (K338M, K348A, R349A, R369A)                                               | This study |
| DMY2234 | BY4741; MATa, his3-1, leu2-0, met15-0, ura3-0, bem1 px (K338M, K348A, R349A, R369A)-GFP::HIS5                                     | This study |
| DMY2266 | BY4741; MATa, his3-1, leu2-0, met15-0, ura3-0, CDC24-3xHA::URA3                                                                   | This study |
| DMY2268 | BY4741; MATa, his3-1, leu2-0, met15-0, ura3-0, cdc24 ph (K513A)-3xHA::URA3                                                        | This study |
| DMY2307 | BY4741; MATa, his3-1, leu2-0, met15-0, ura3-0, cho1Δ::kanMX6                                                                      | This study |
| DMY2309 | BY4741; MATa, his3-1, leu2-0, met15-0, ura3-0, cho1Δ::kanMX6, BEM1-GFP::HIS5                                                      | This study |
| DMY2323 | BY4741; MATa, his3-1, leu2-0, met 15 -0, ura3-0, bem1 px (K338M, K348A, R349A & R369A), CDC24-3xHA::URA3                          | This study |
| DMY2325 | MATa, his3-1, leu2-0, met 15 -0, ura3-0, bem1 px (K338M, K348A, R349A & R369A), cdc24 ph (K513A)-3xHA::URA3                       | This study |
| DMY2340 | BY4741; MATa, his3-1, leu2-0, met15-0, ura3-0, pGD1-osTIR-LEU2::leu2-0, pKan-pCUP1-9xMyc-AID-stt4, BEM1-GFP::HIS5, cho1Δ ::kanMX6 | This study |
| DMY2398 | BY4741; MATa, his3-1, leu2-0, met15-0, ura3-0, bem1 ΔN-term (Δ1-68)                                                               | This study |
| DMY2470 | BY4741; MATa, his3-1, leu2-0, met15-0, ura3-0, bem1 ΔN-term (Δ1-68) px (K338M, K348A, R349A & R369A)                              | This study |
| DMY2472 | BY4741; MATa, his3-1, leu2-0, met15-0, ura3-0, bem1 clic-14E                                                                      | This study |

|         |                                                                                                                                         |            |
|---------|-----------------------------------------------------------------------------------------------------------------------------------------|------------|
| DMY2478 | BY4741; MATa, <i>his3-1, leu2-0, met15-0, ura3-0, bem1 px (K338M, K348A, R349A, R369A)</i> -3xHA::HIS5                                  | This study |
| DMY2486 | BY4741; MATa, <i>his3-1, leu2-0, met15-0, ura3-0, BEM1</i> -3xHA::HIS5                                                                  | This study |
| DMY2496 | BY4741; MATa, <i>his3-1, leu2-0, met15-0, ura3-0, bem1 clic-14E</i> -3xHA::HIS5                                                         | This study |
| DMY2498 | BY4741; MATa, <i>his3-1, leu2-0, met15-0, ura3-0, bem1 clic-14E-GFP</i> ::HIS5                                                          | This study |
| DMY2502 | BY4741; MATa, <i>his3-1, leu2-0, met15-0, ura3-0, bem1 clic-14E px (K338M K348A R349A R369A)</i>                                        | This study |
| DMY2508 | BY4741; MATa, <i>his3-1, leu2-0, met15-0, ura3-0, bem1 clic-14E px (K338M K348A R349A R369A)</i> -GFP::HIS5                             | This study |
| DMY2510 | BY4741; MATa, <i>his3-1, leu2-0, met15-0, ura3-0, bem1 clic-14E px (K338M K348A R349A R369A)</i> -3xHA::HIS5                            | This study |
| DMY2520 | BY4741; MATa, <i>his3-1, leu2-0, met15-0, ura3-0, bem1 clic-14E, CDC24</i> -3xHA::URA3                                                  | This study |
| DMY2522 | BY4741; MATa, <i>his3-1, leu2-0, met15-0, ura3-0, bem1 clic-14E, cdc24 K513A</i> -3xHA::URA3                                            | This study |
| DMY2523 | BY4741; MATa, <i>his3-1, leu2-0, met15-0, ura3-0, bem1 clic-14E px (K338M, K348A, R349A &amp; R369A), CDC24</i> -3xHA::URA3             | This study |
| DMY2524 | BY4741; MATa, <i>his3-1, leu2-0, met15-0, ura3-0, bem1 clic-14E, px (K338M, K348A, R349A &amp; R369A), cdc24 px (K513A)</i> -3xHA::URA3 | This study |
| DMY2532 | BY4741; MATa, <i>his3-1, leu2-0, met15-0, ura3-0, pGD1-osTIR-LEU2::leu2-0, pKan-pCUP1-9xMyc-AID-stt4, cho1Δ</i> ::kanMX6                | This study |

1164

1165 **Supplementary table 3. Source of lipids and composition.**

| Avanti number | Name                                       | Origin       | Major structures           |
|---------------|--------------------------------------------|--------------|----------------------------|
| 840051C       | L- $\alpha$ -phosphatidylcholine (PC)      | Egg, Chicken | 16:0 (32.7%), 18:1 (32%)   |
| 840021C       | L- $\alpha$ -phosphatidylethanolamine (PE) | Egg, Chicken | 18:0 (24.2%)               |
| 840101C       | L- $\alpha$ -phosphatidic acid (PA)        | Egg, Chicken | 16:0 (34.2%), 18:1 (31.5%) |

|         |                                                                             |                |                            |
|---------|-----------------------------------------------------------------------------|----------------|----------------------------|
| 840044C | L- $\alpha$ -phosphatidylinositol (PI)                                      | Soy            | 18:2 (50%)                 |
| 840046X | L- $\alpha$ -phosphatidylinositol-4,5-bisphosphate (PI(4,5)P <sub>2</sub> ) | Brain, Porcine | 18:0 (37%), 20:4 (36.8%)   |
| 840045X | L- $\alpha$ -phosphatidylinositol-4-phosphate (PI4P)                        | Brain, Porcine | 18:0 (37.3%), 20:4 (33.1%) |
| 840032C | L- $\alpha$ -phosphatidylserine (PS)                                        | Brain, Porcine | 18:0 (42%), 18:1 (30%)     |

1166

1167



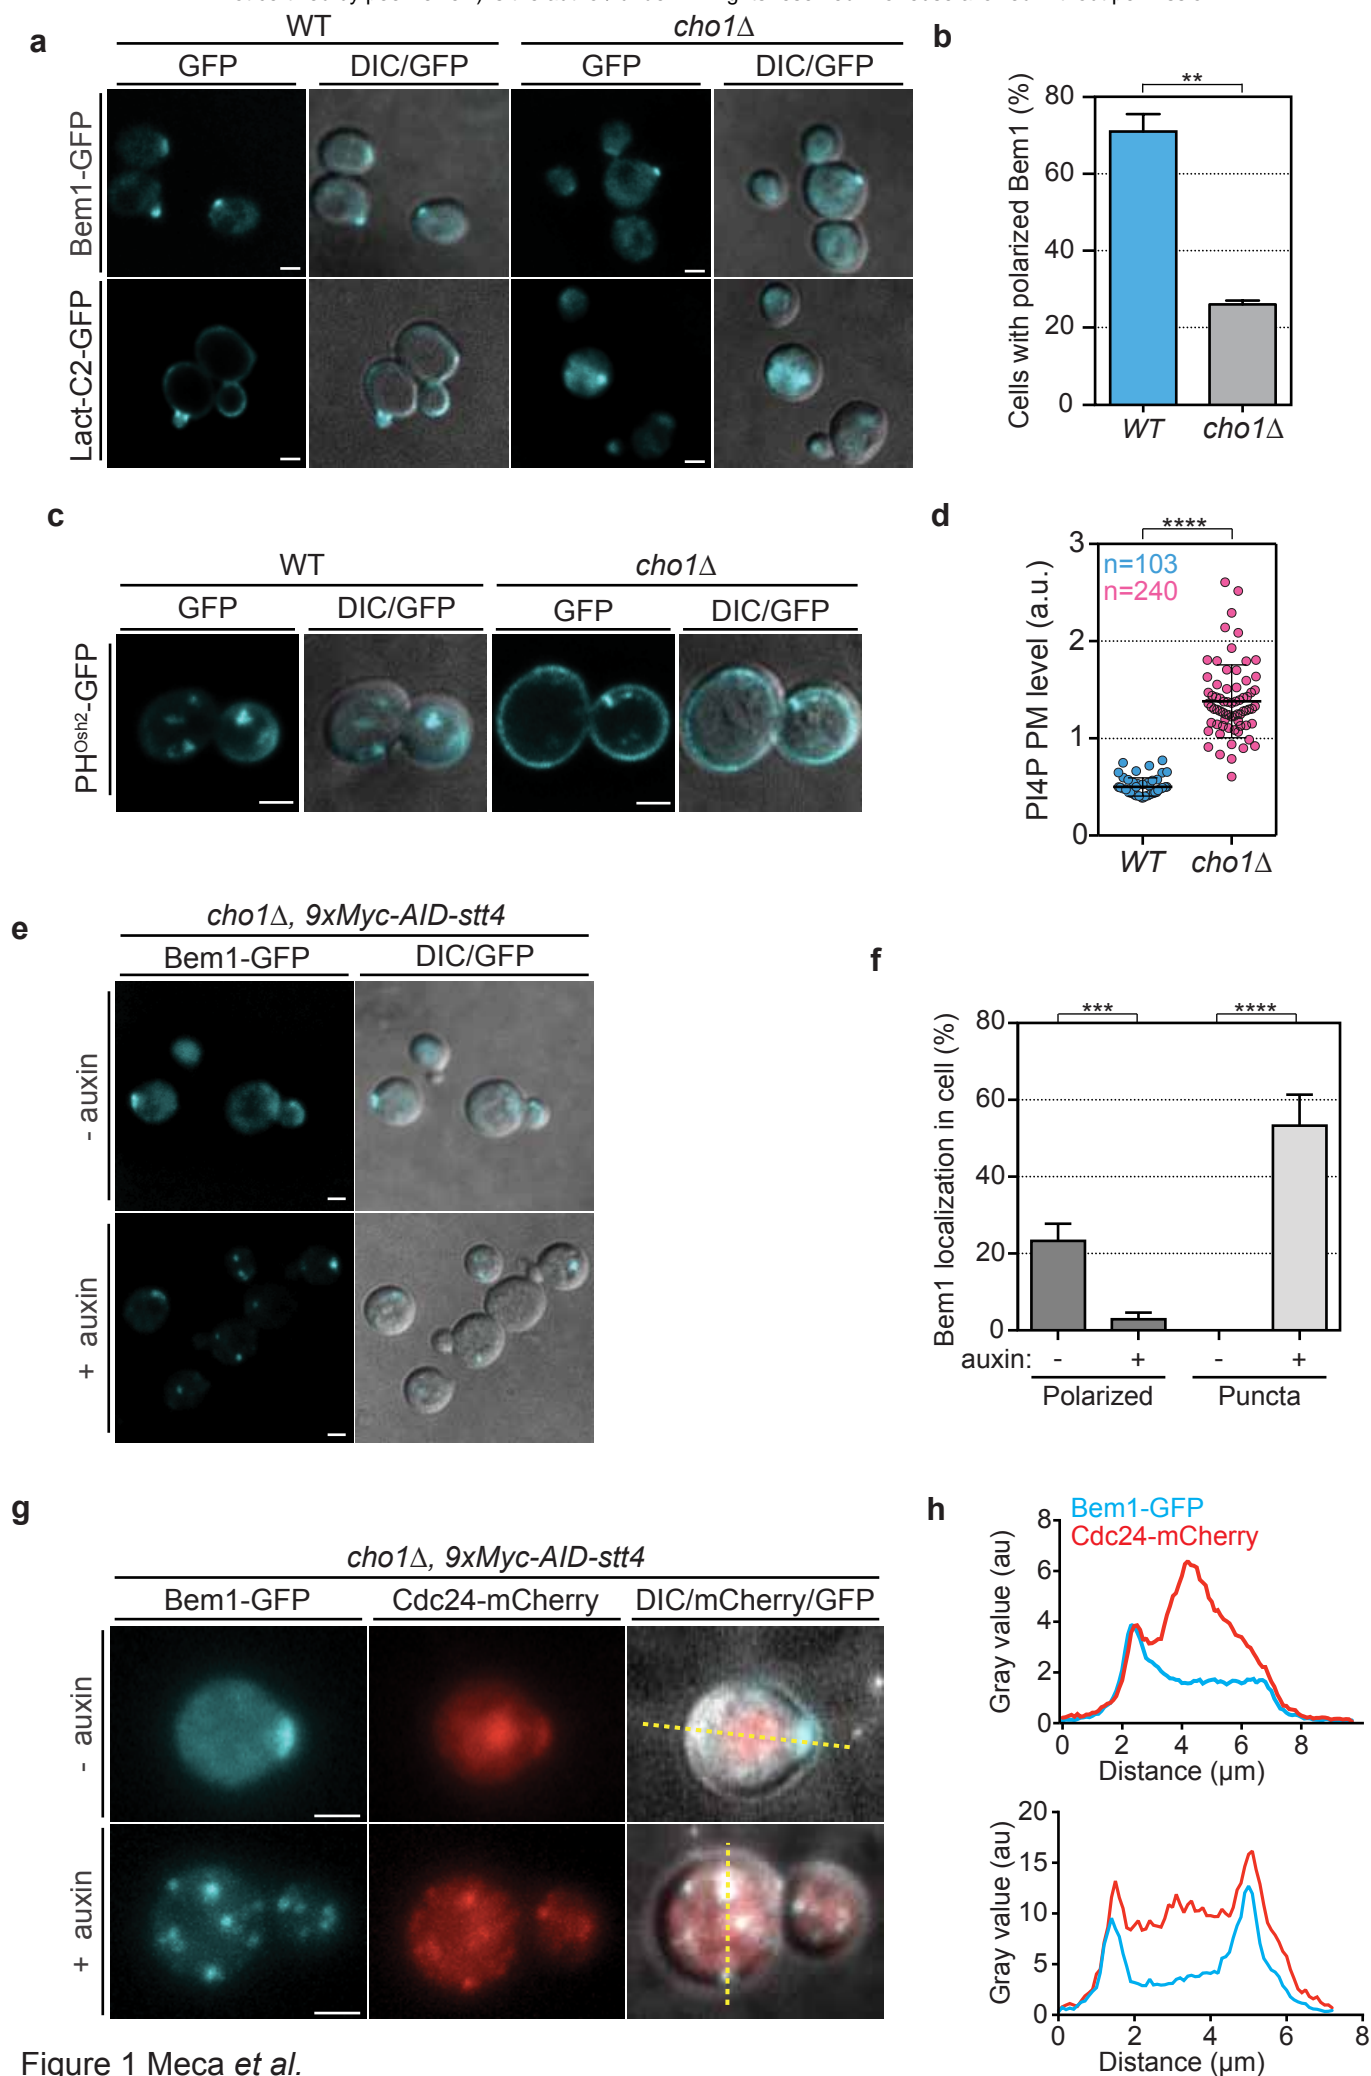

Figure 1 Meca *et al.*

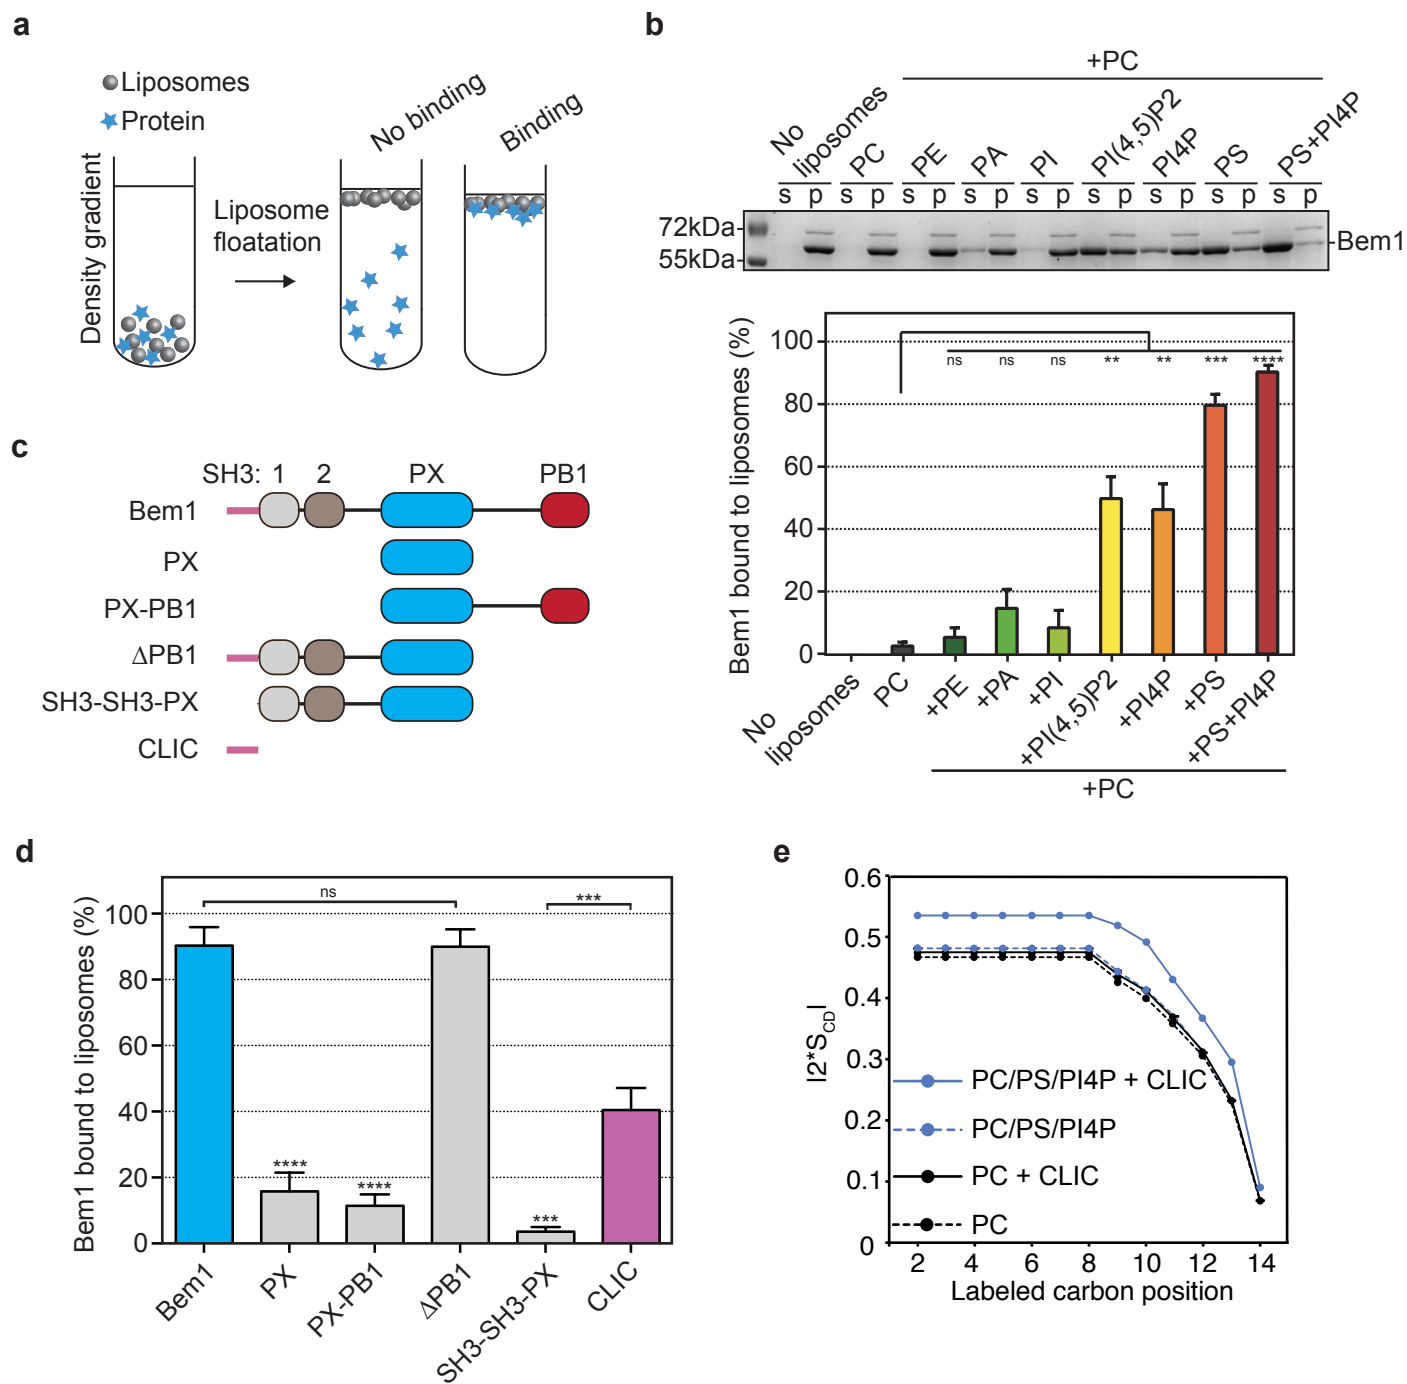

Figure 2 Meca *et al.*

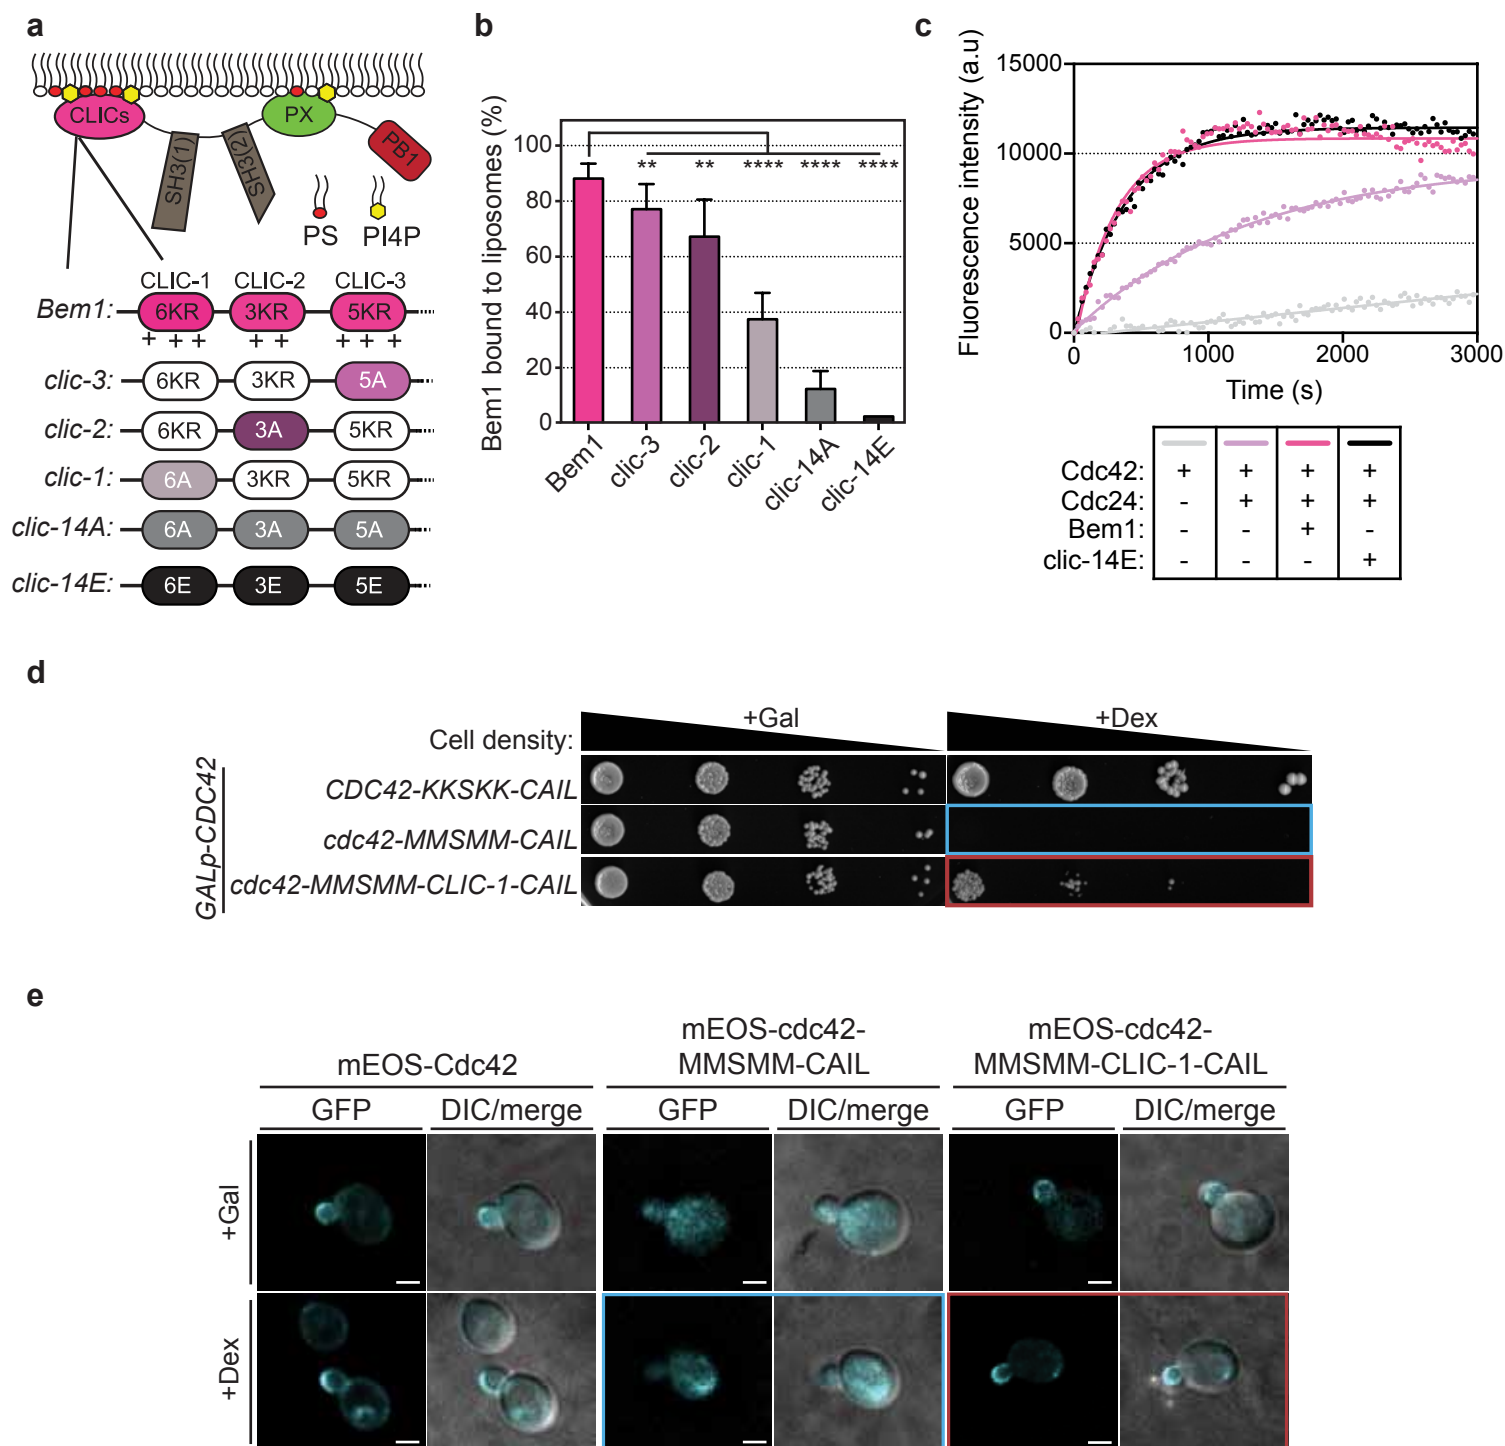

Figure 3 Meca *et al.*

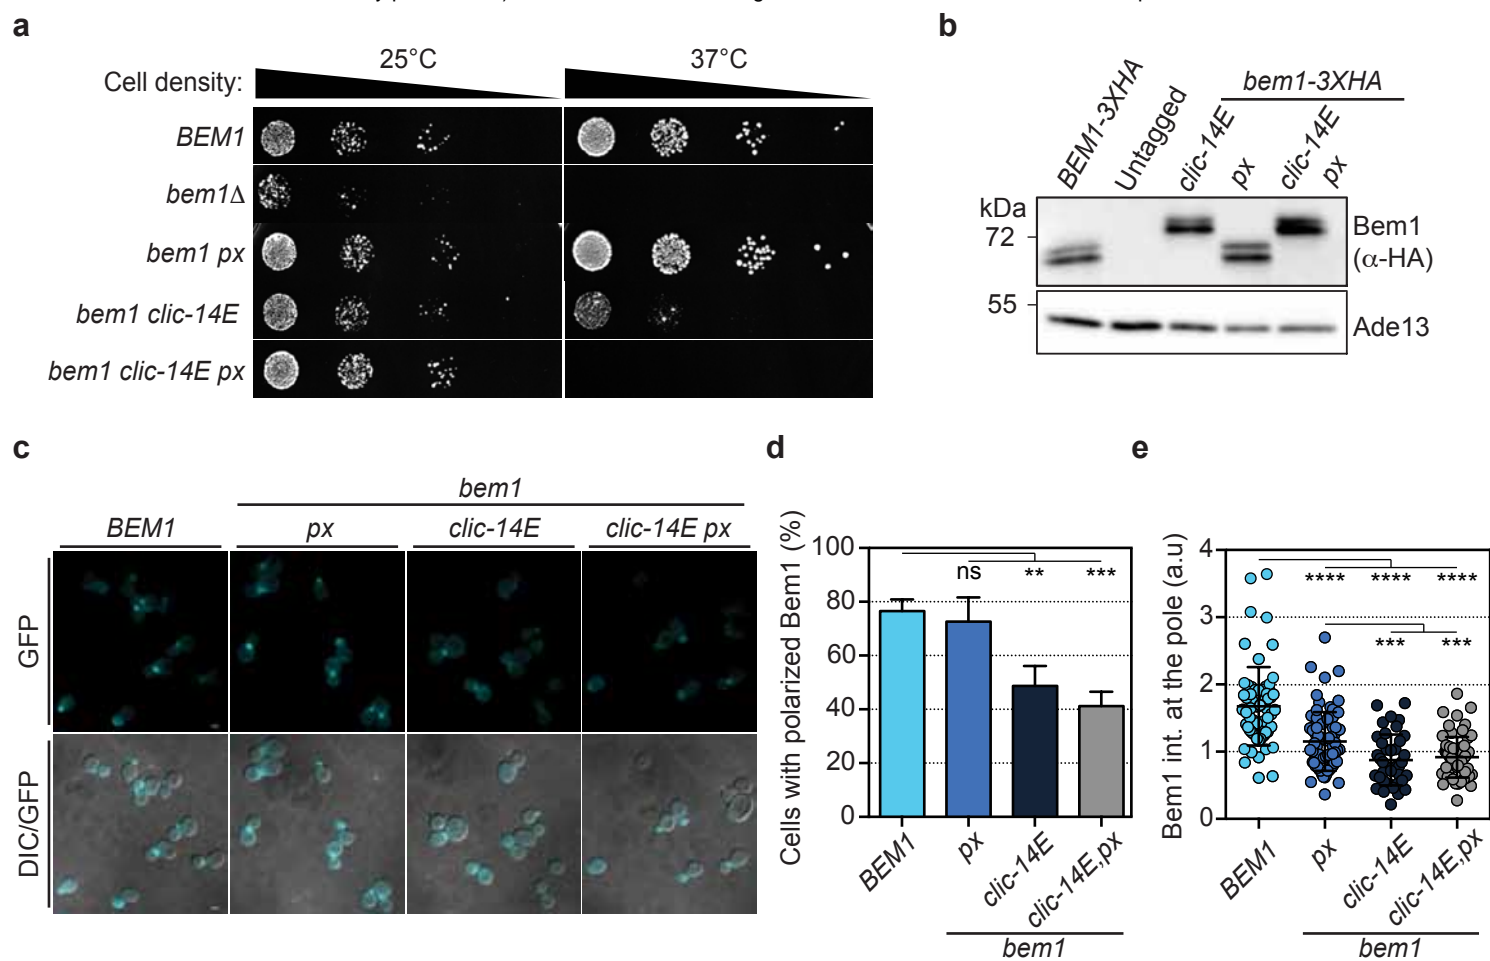

Figure 4 Meca *et al.*

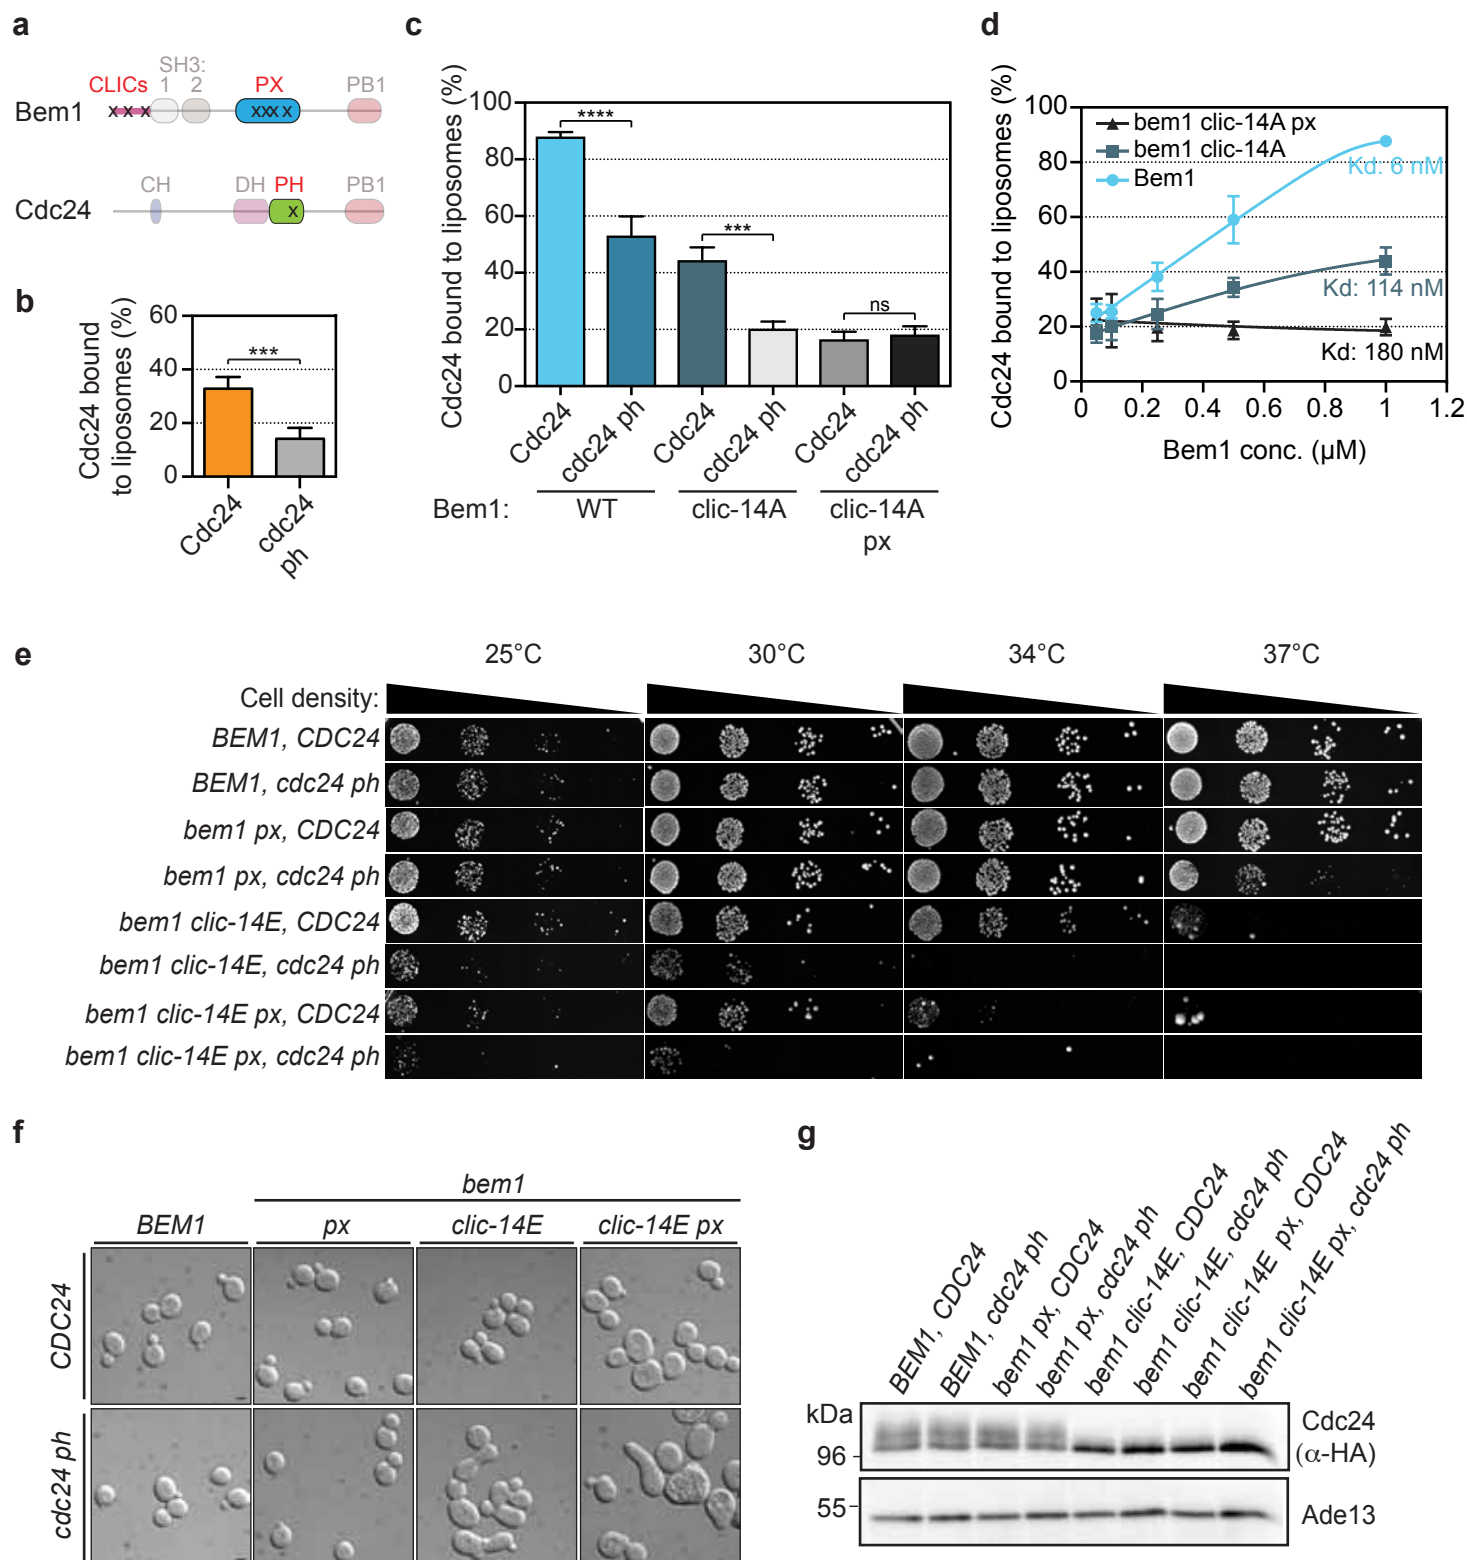

Figure 5 Meca *et al.*

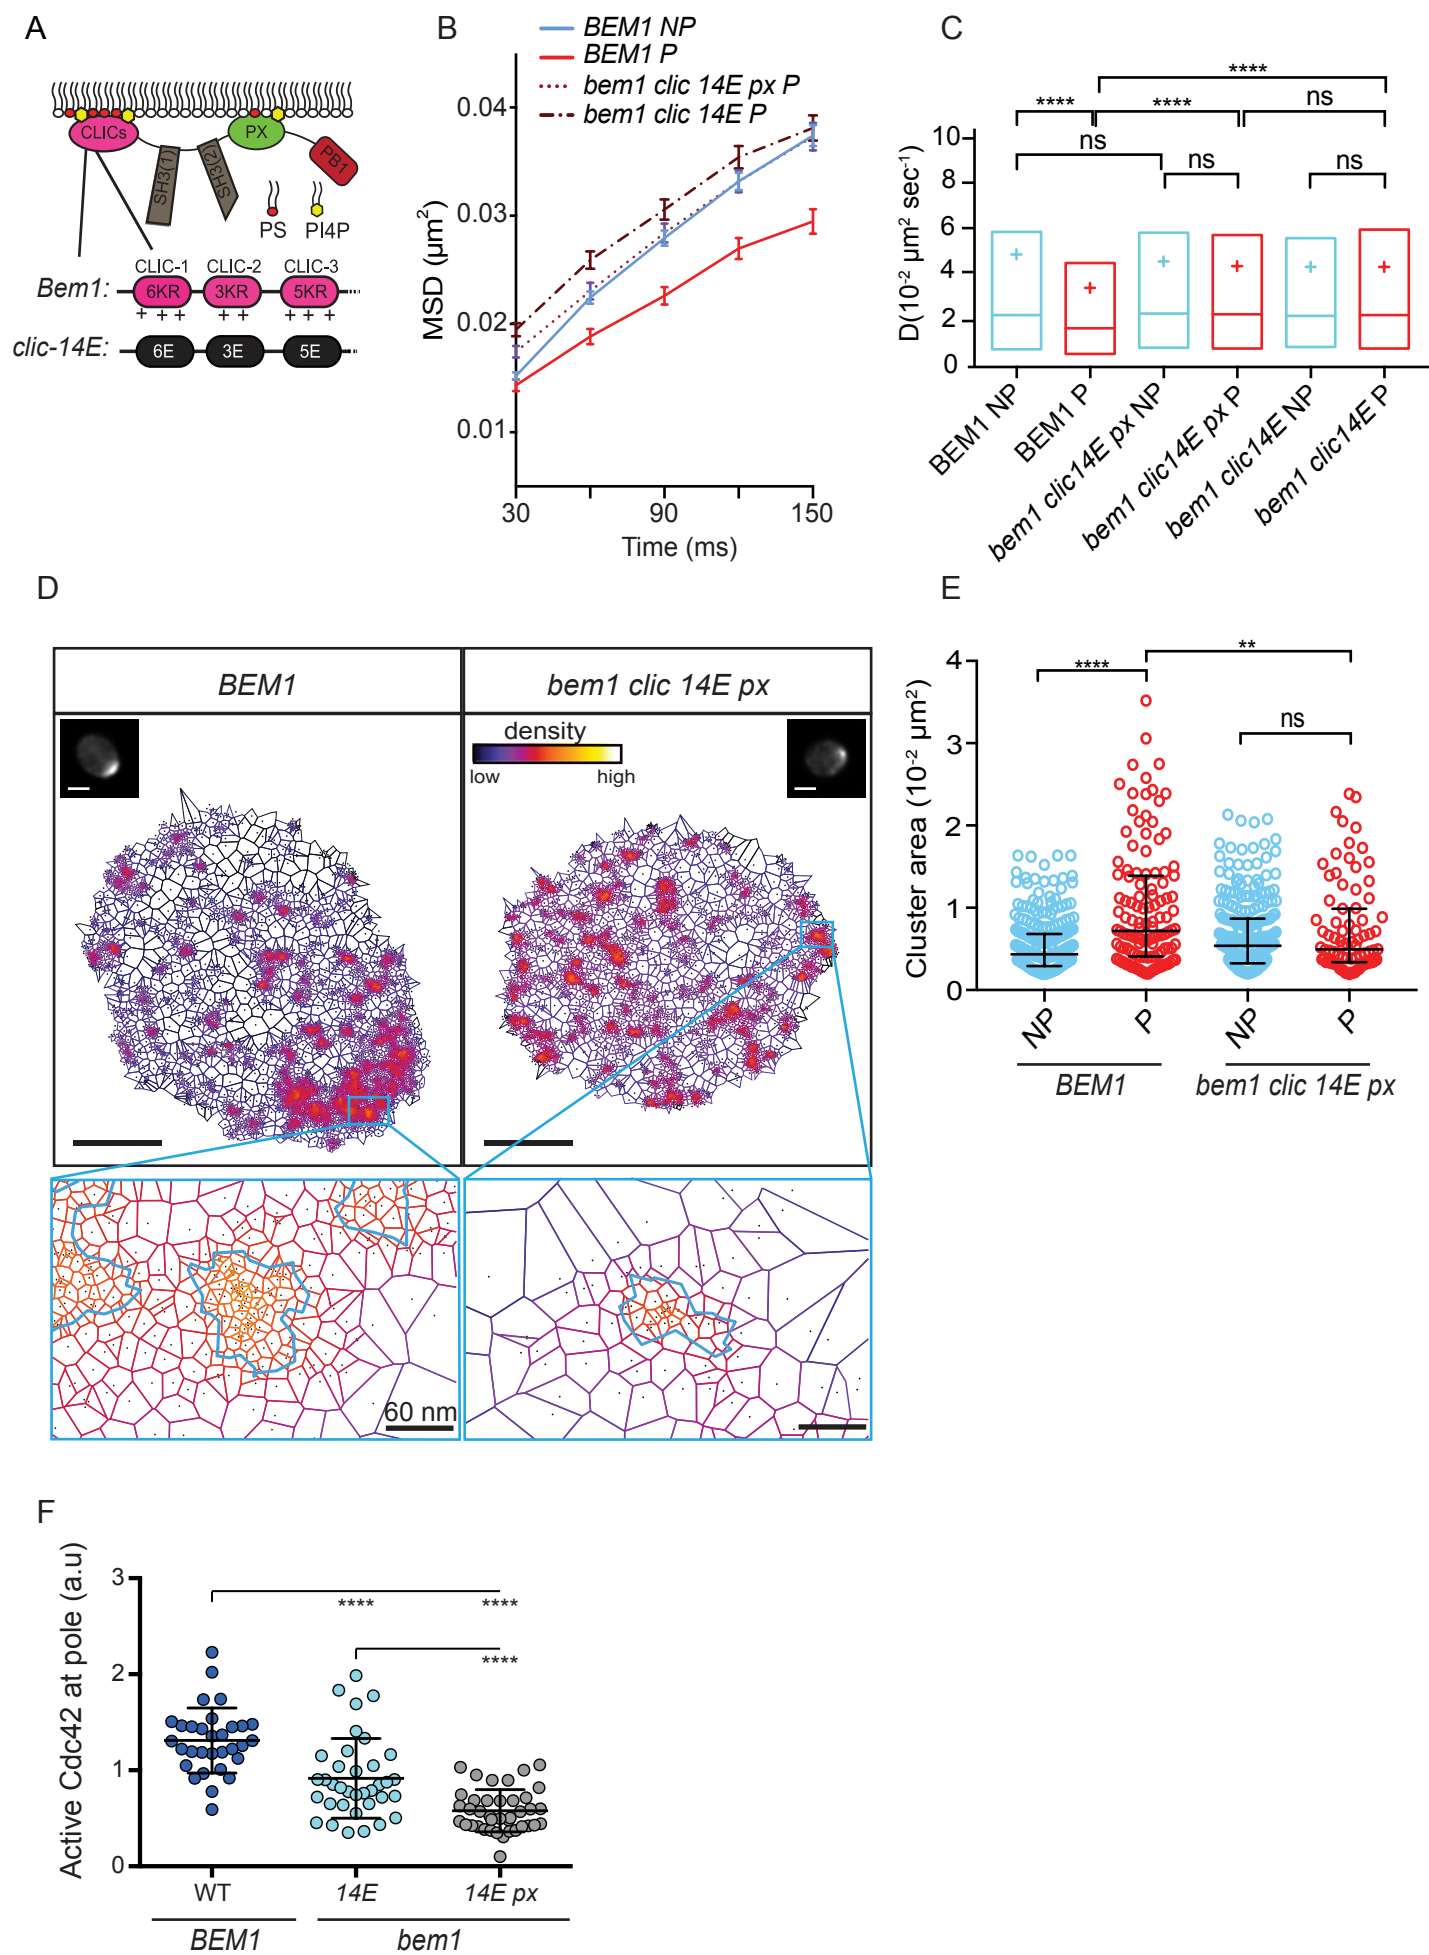

Figure 6 Meca et al.

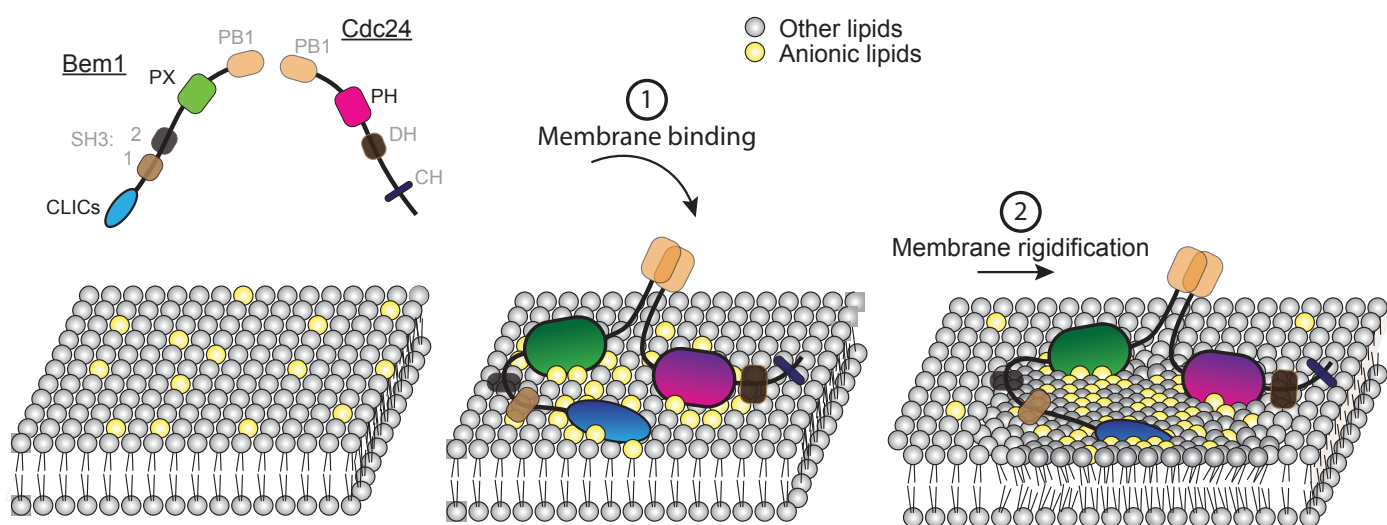

Figure 7 Meca *et al.*

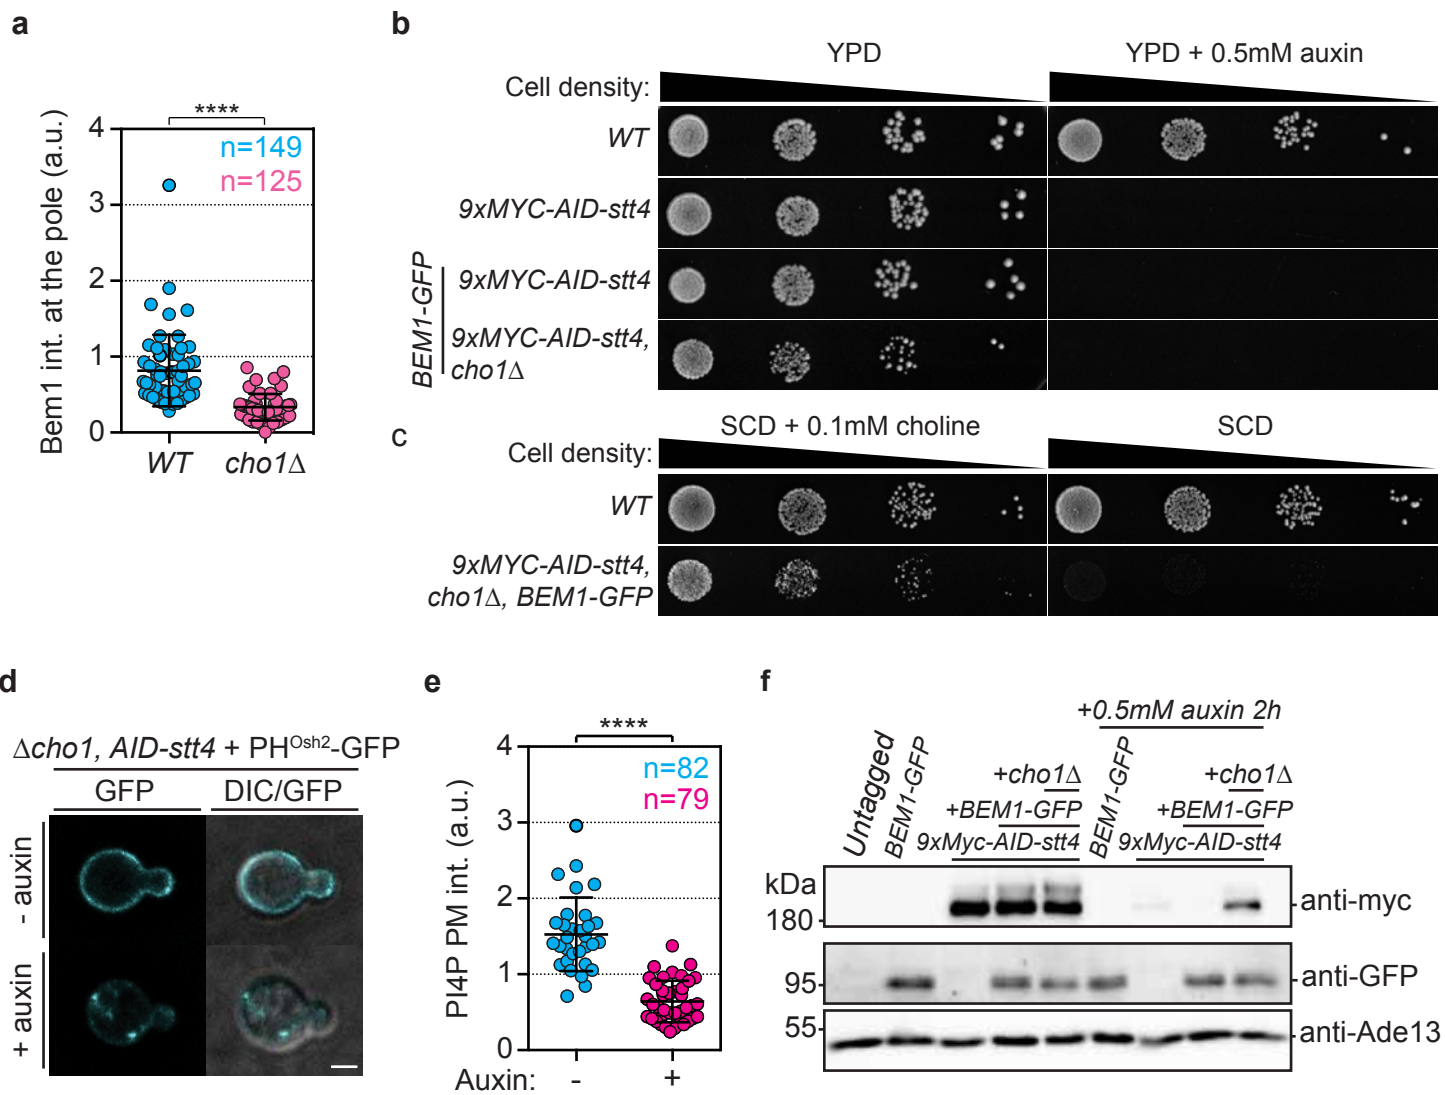



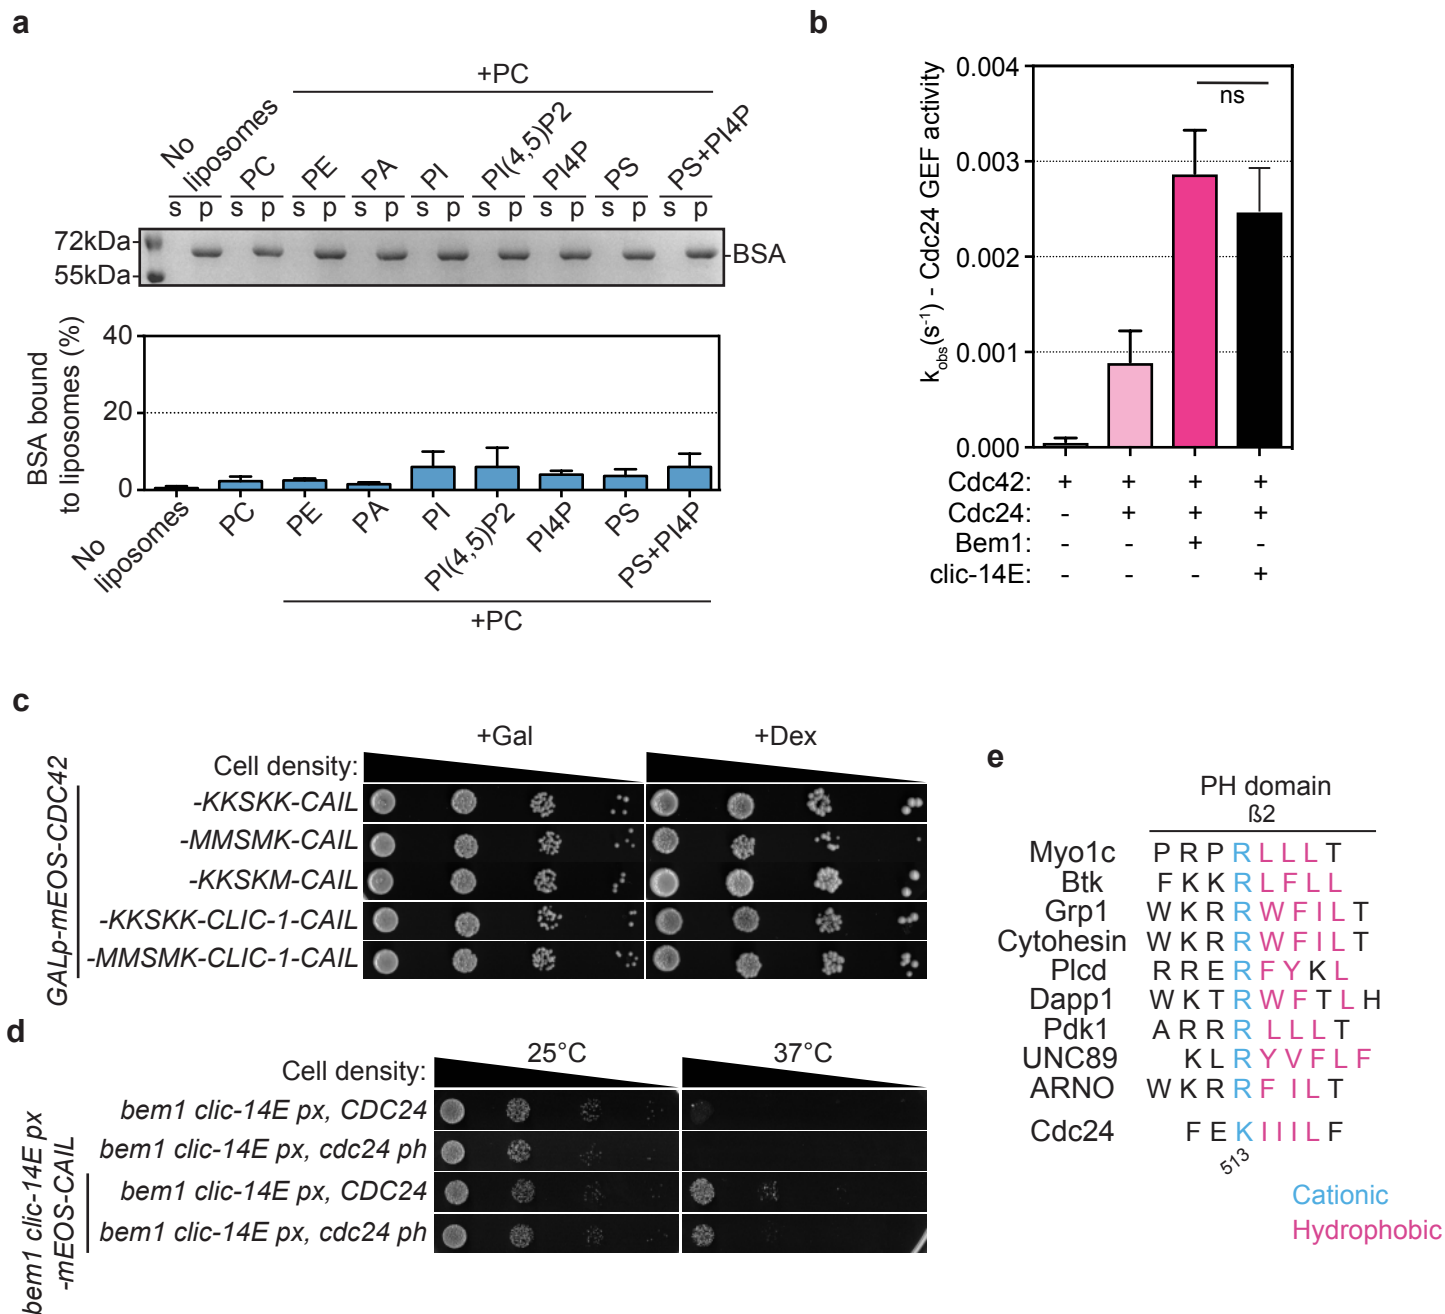

Source: https://www.biorxiv.org/content/10.1101/303024v1.full.pdf
